# Supplementary material for: An efficient and confluent approach for the synthesis of novel 3,4-dihydro-2H-naphtho[2,3-e][1,3]oxazine-5,10-dione derivatives by a three component reaction in ionic liquid
Source: Royal Society of Chemistry journal article supplement (doi:10.1039/c5ra06169e), 2015-01-01

### <sup>1</sup>H NMR of 2a

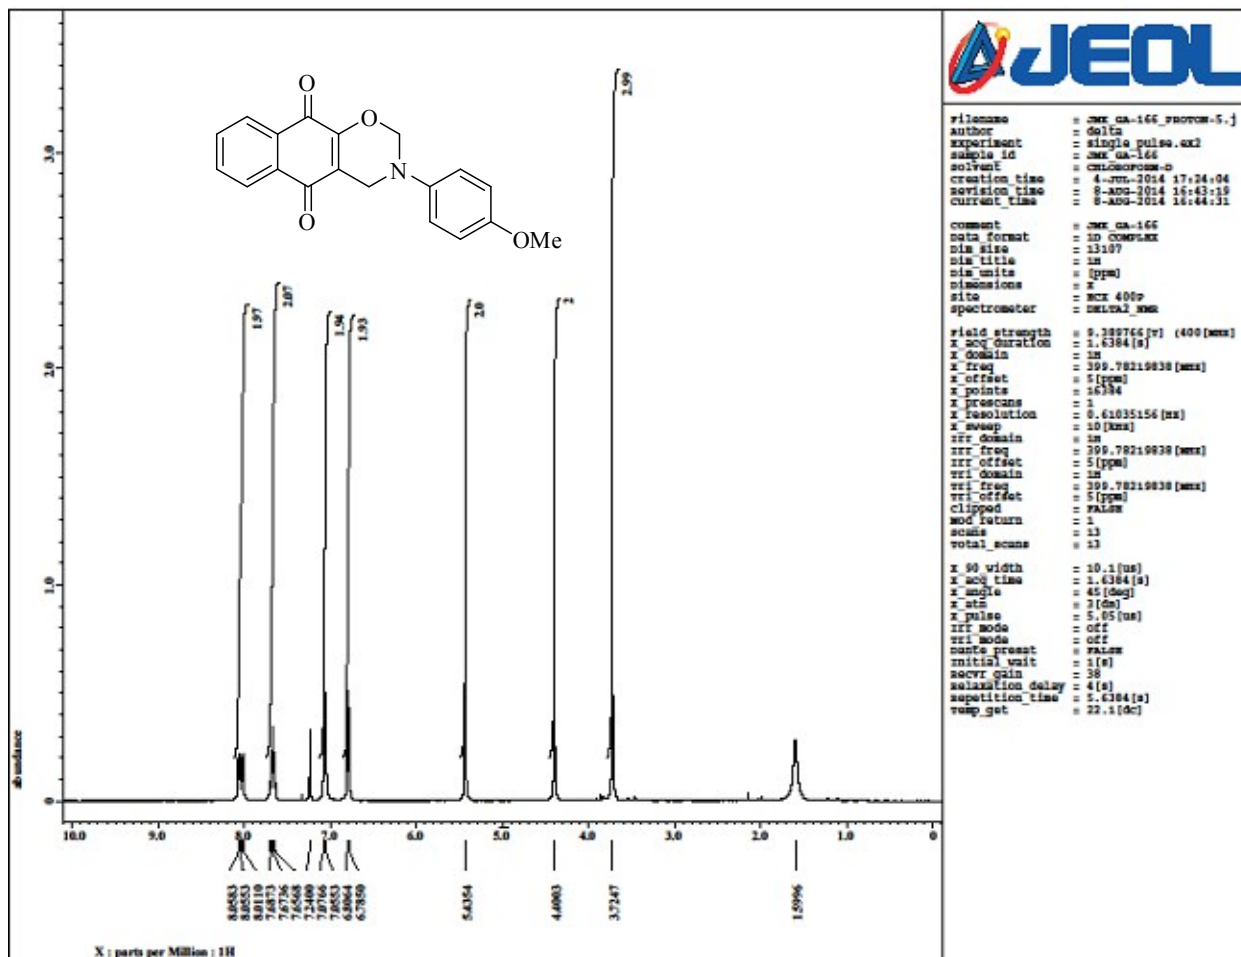

<sup>13</sup>C NMR of 2a

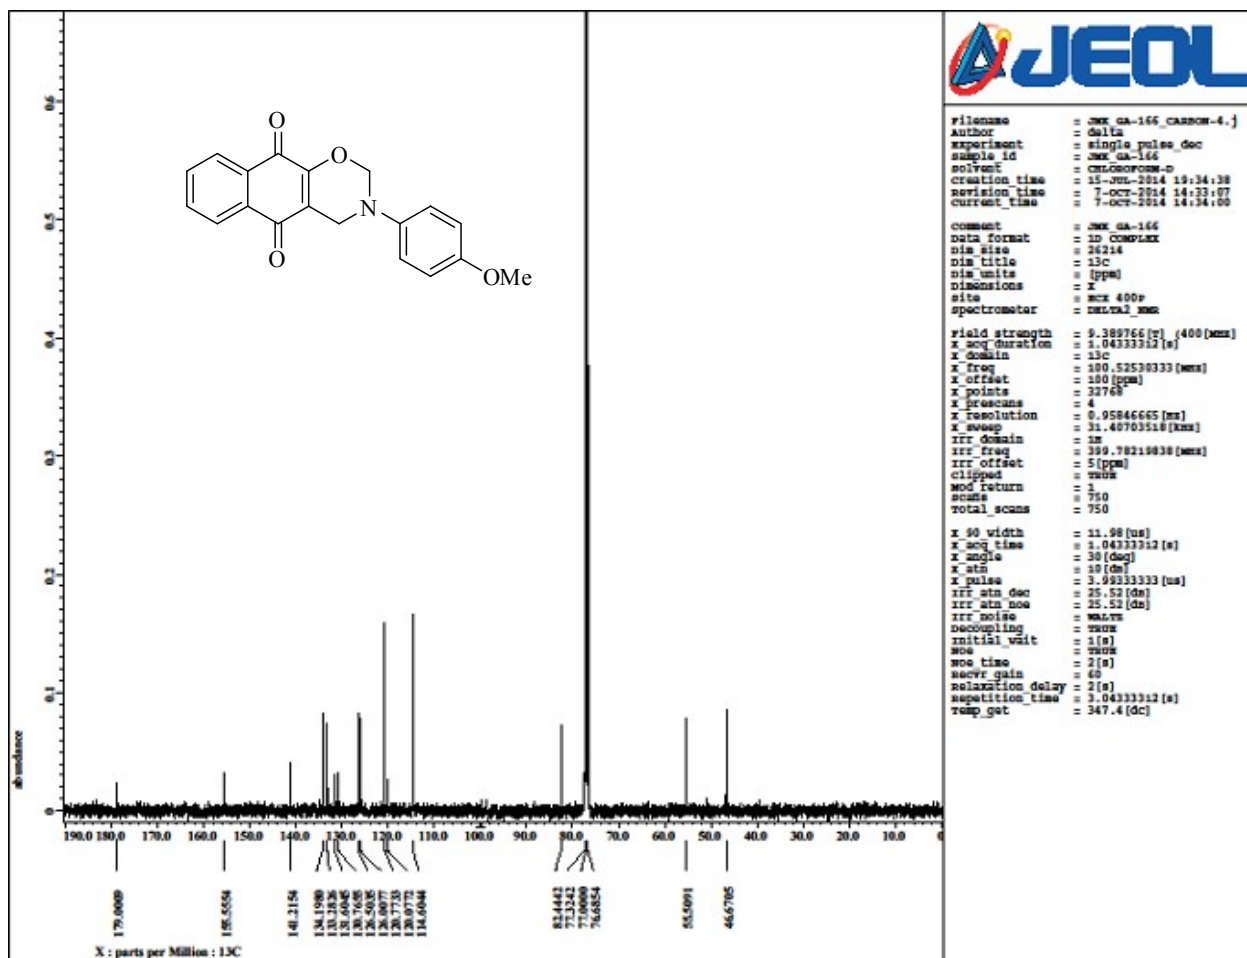

# DEPT NMR of 2a

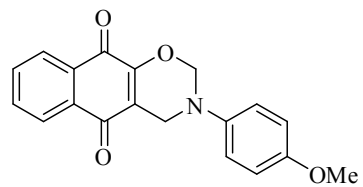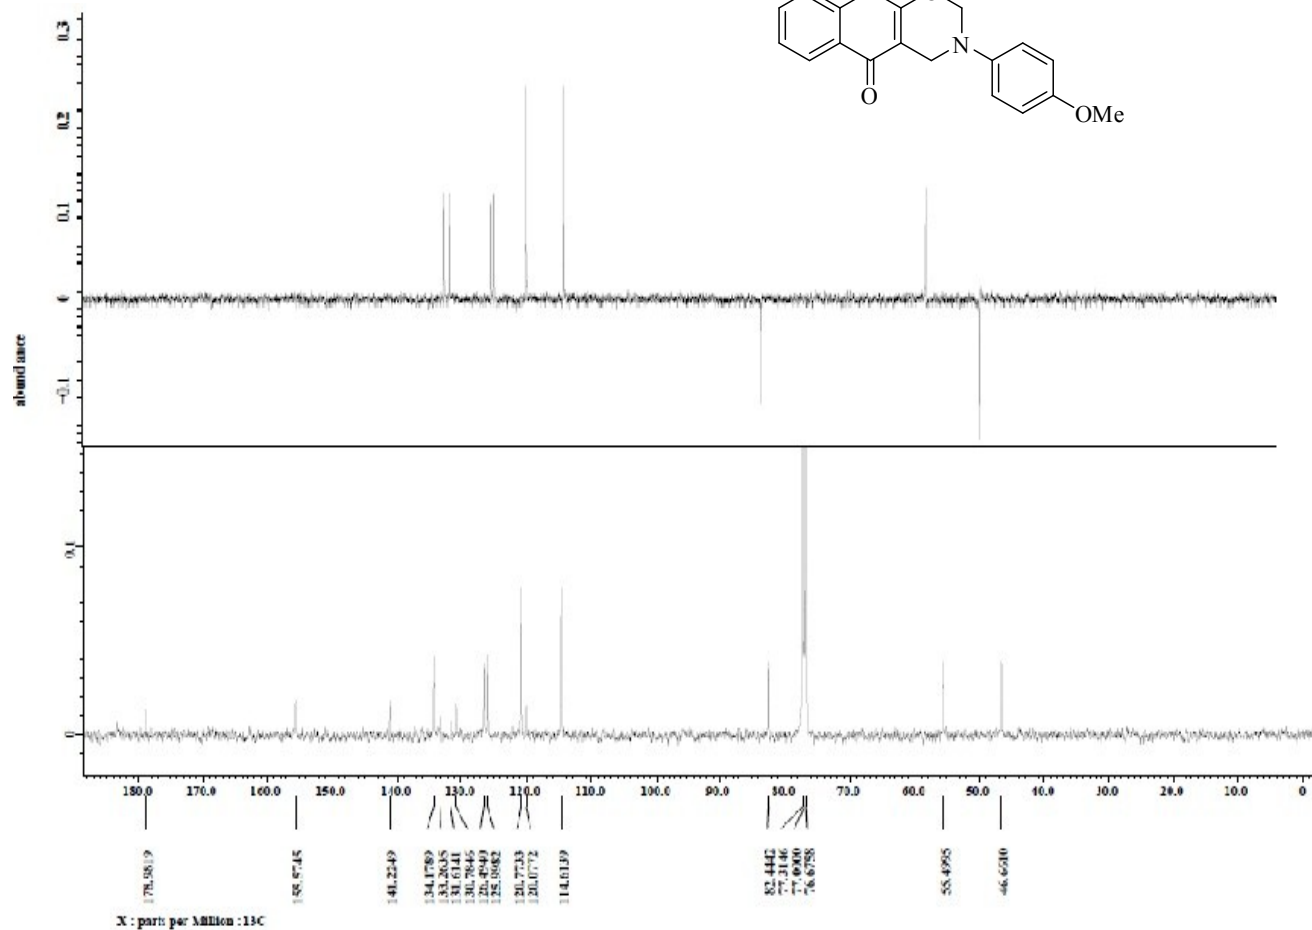

# <sup>1</sup>H NMR of 2b

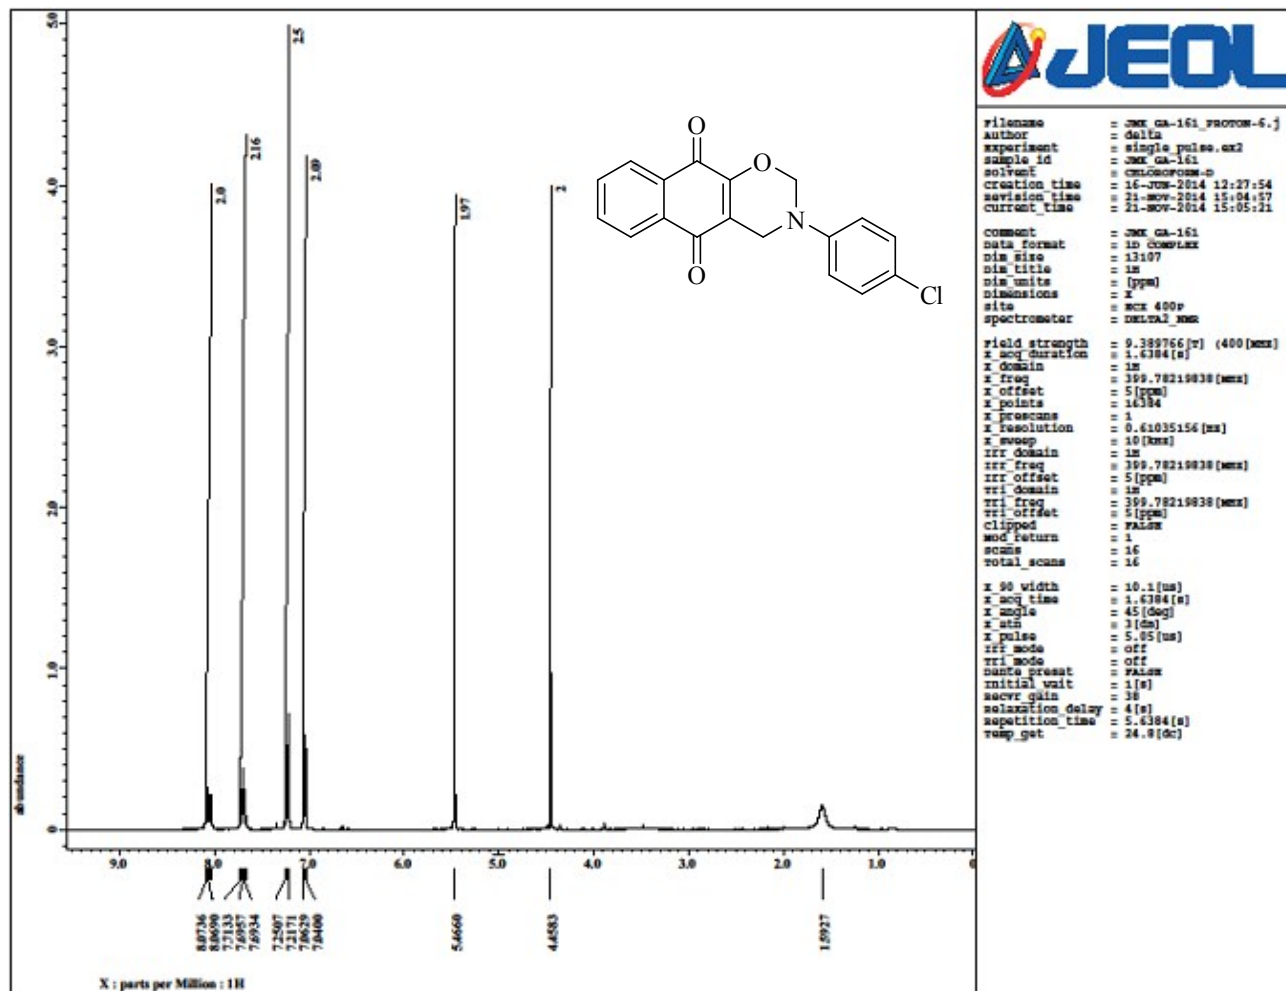

<sup>13</sup>C NMR of 2b

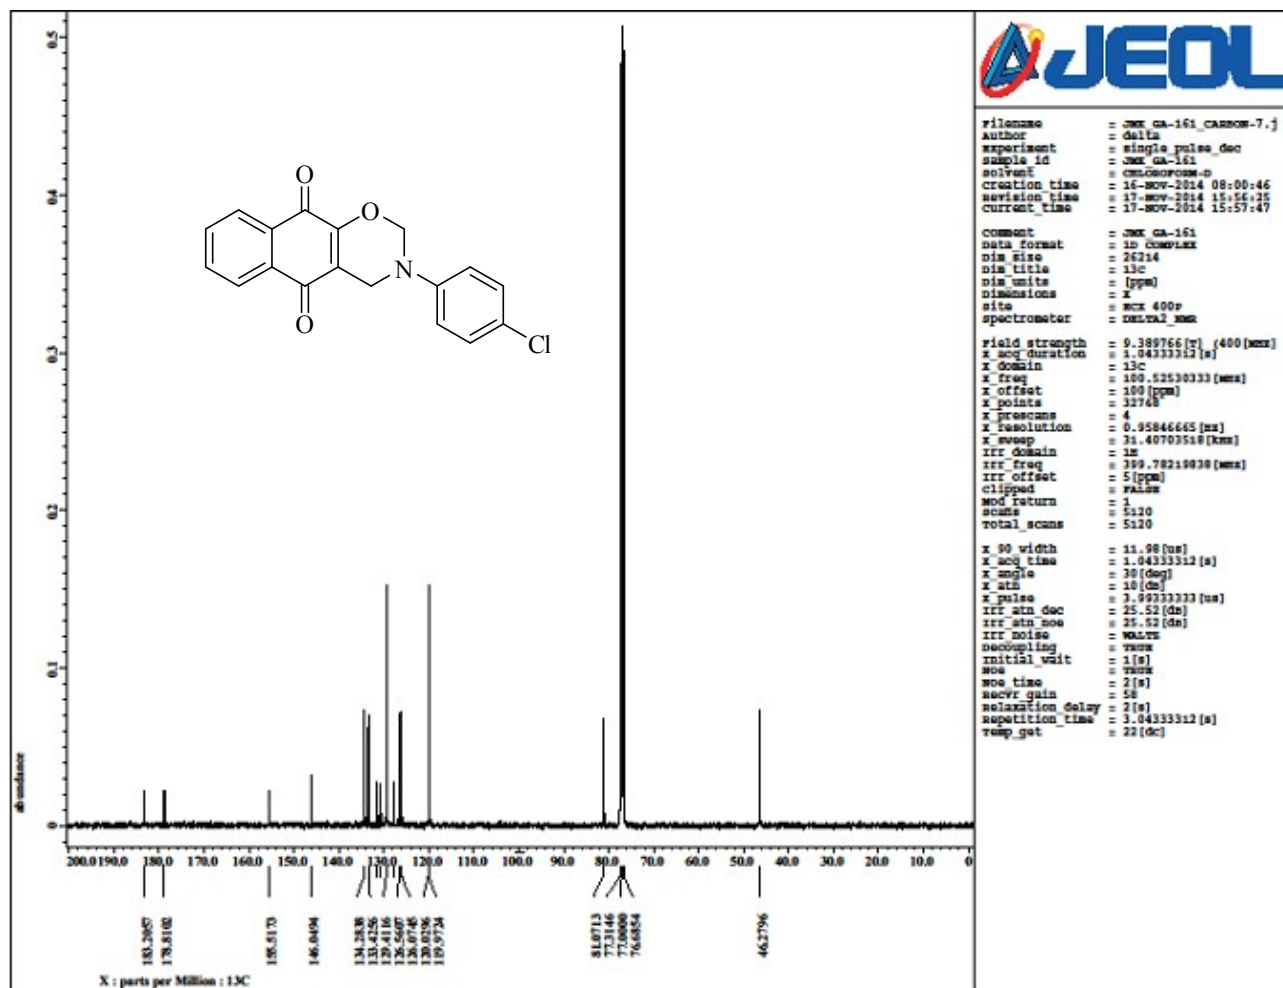

<sup>1</sup>H NMR of 2c

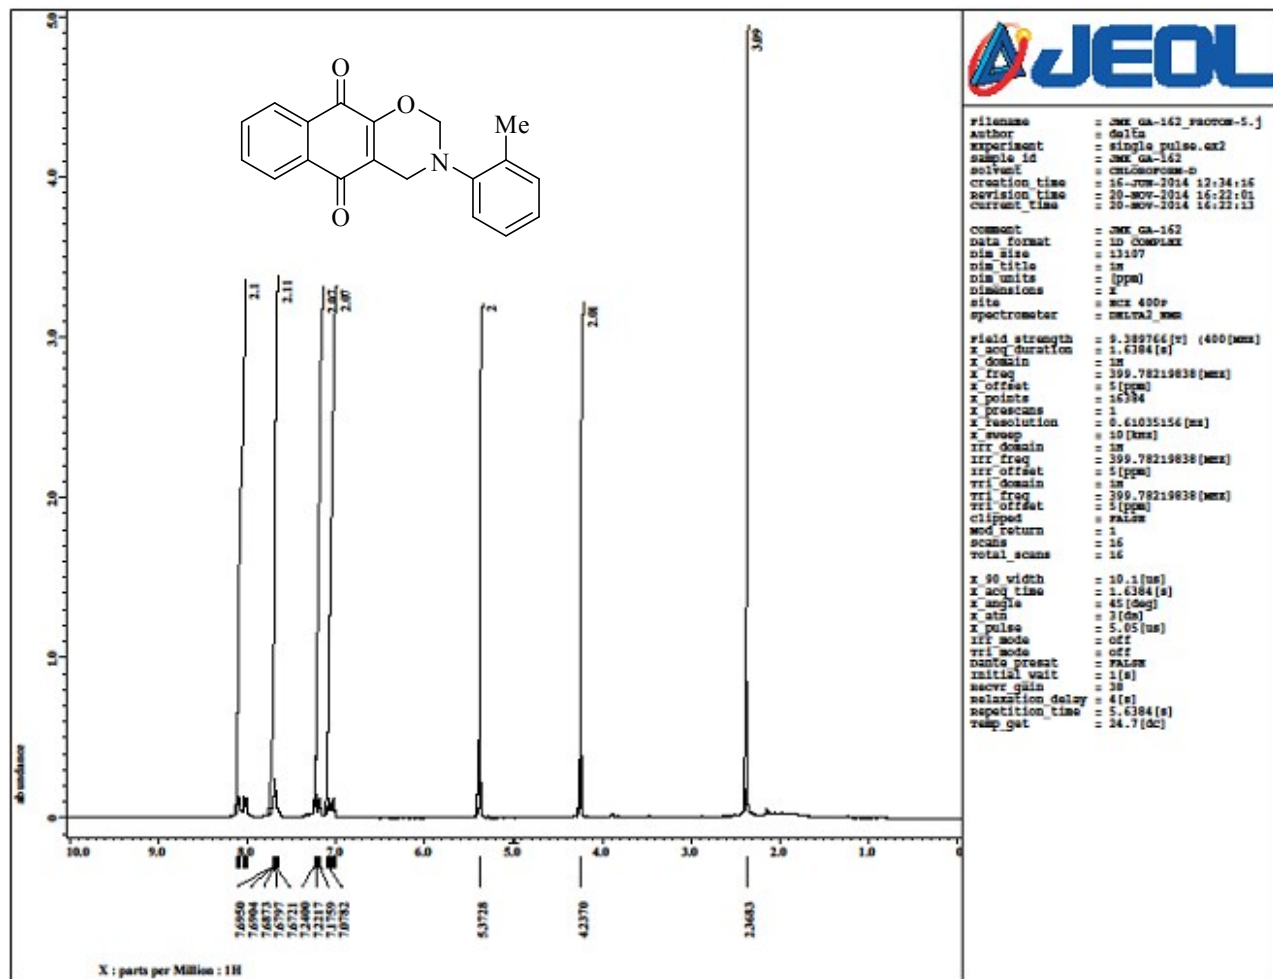

# <sup>13</sup>C NMR of 2c

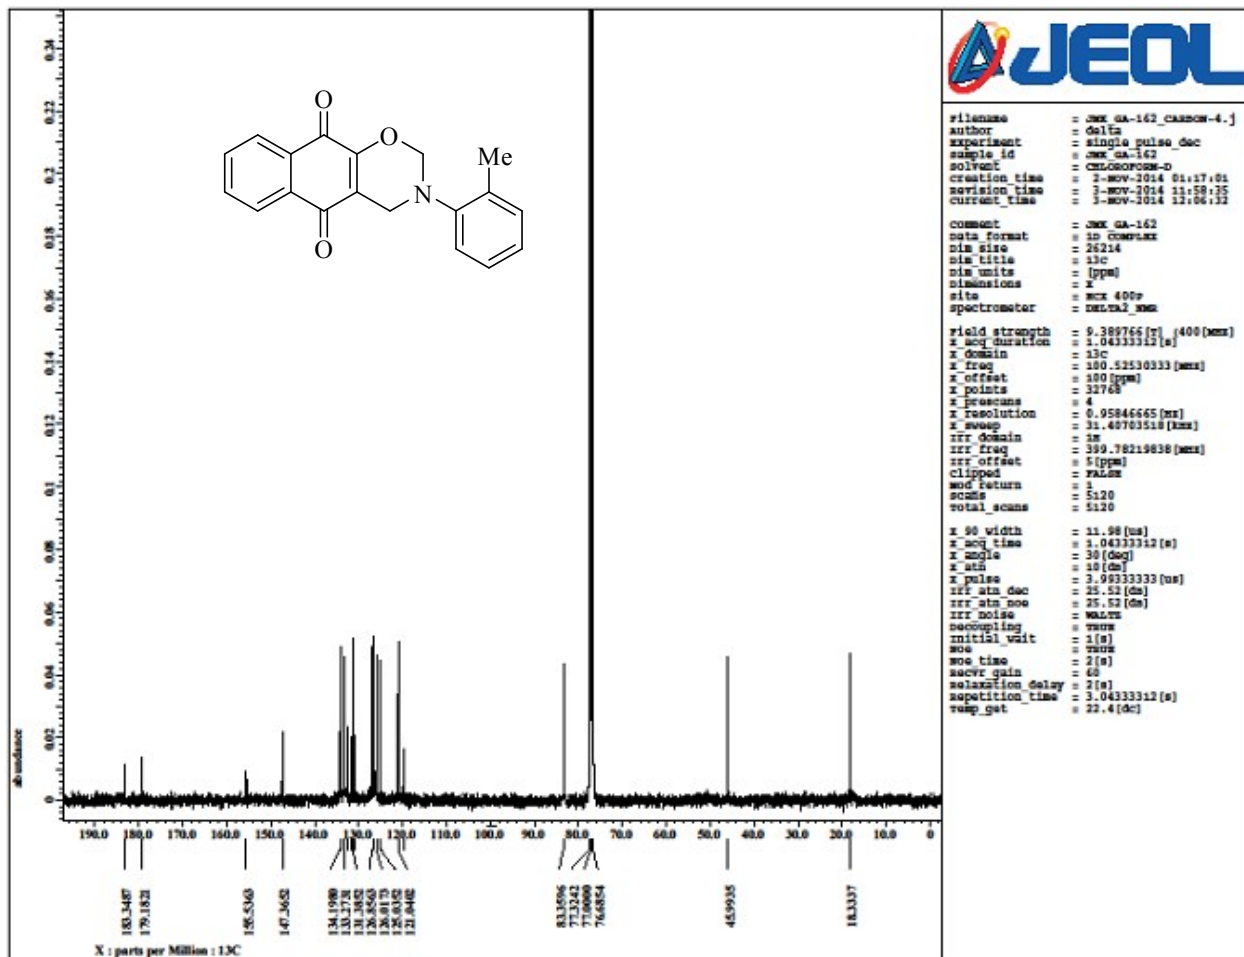

# <sup>1</sup>H NMR of 2d

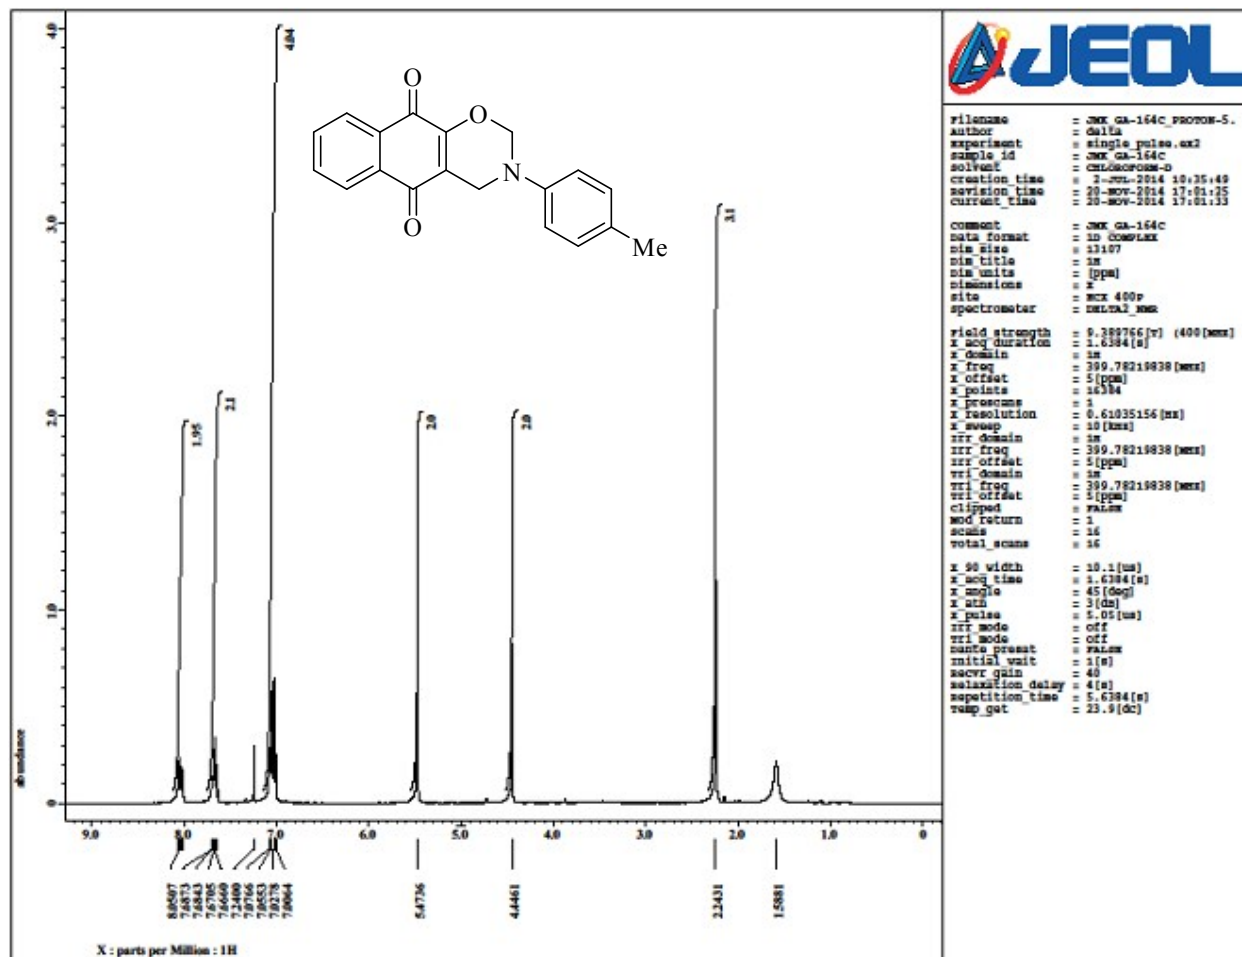



# <sup>13</sup>C NMR of 2d

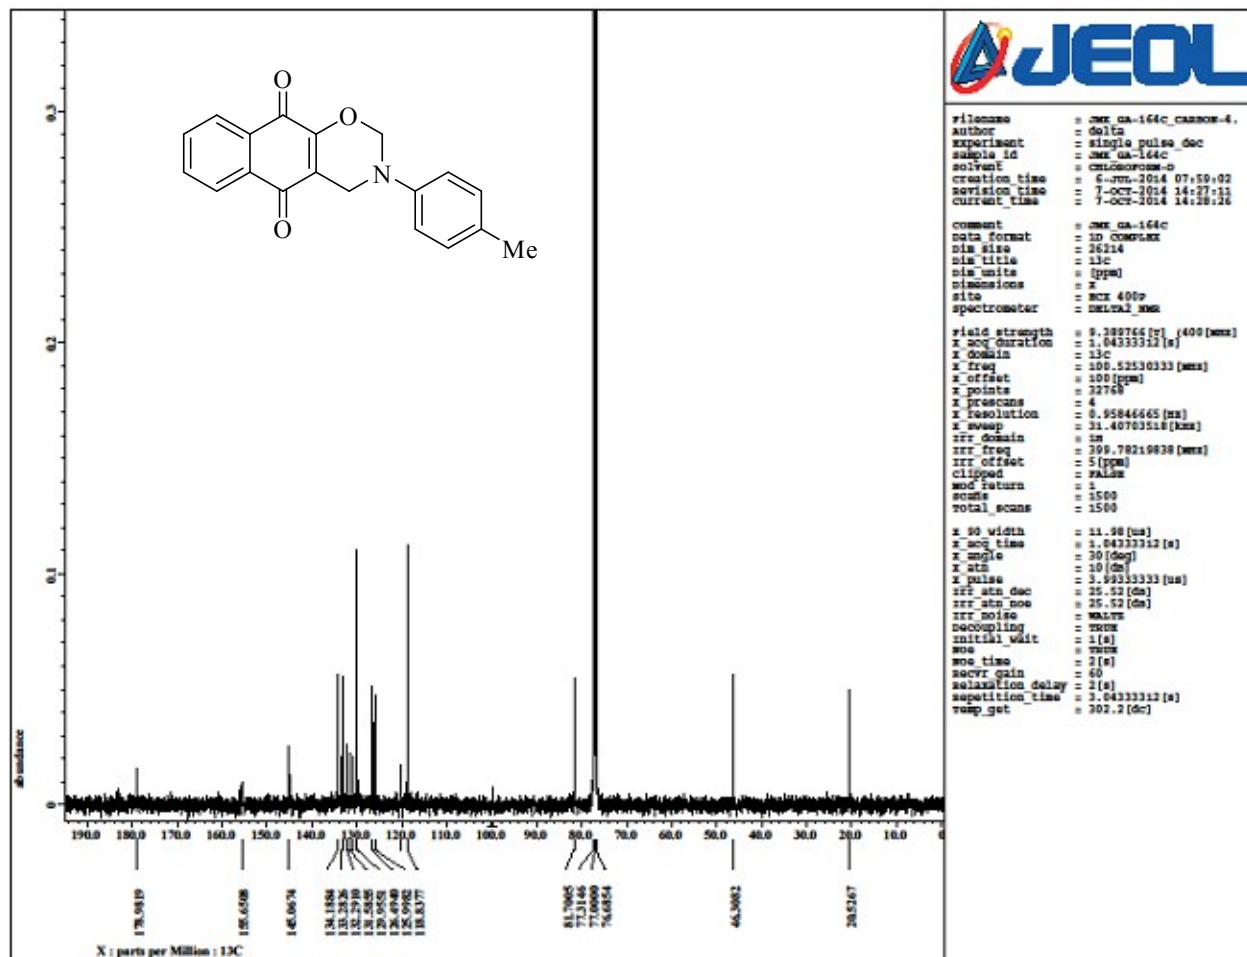

# <sup>1</sup>H NMR of 2e

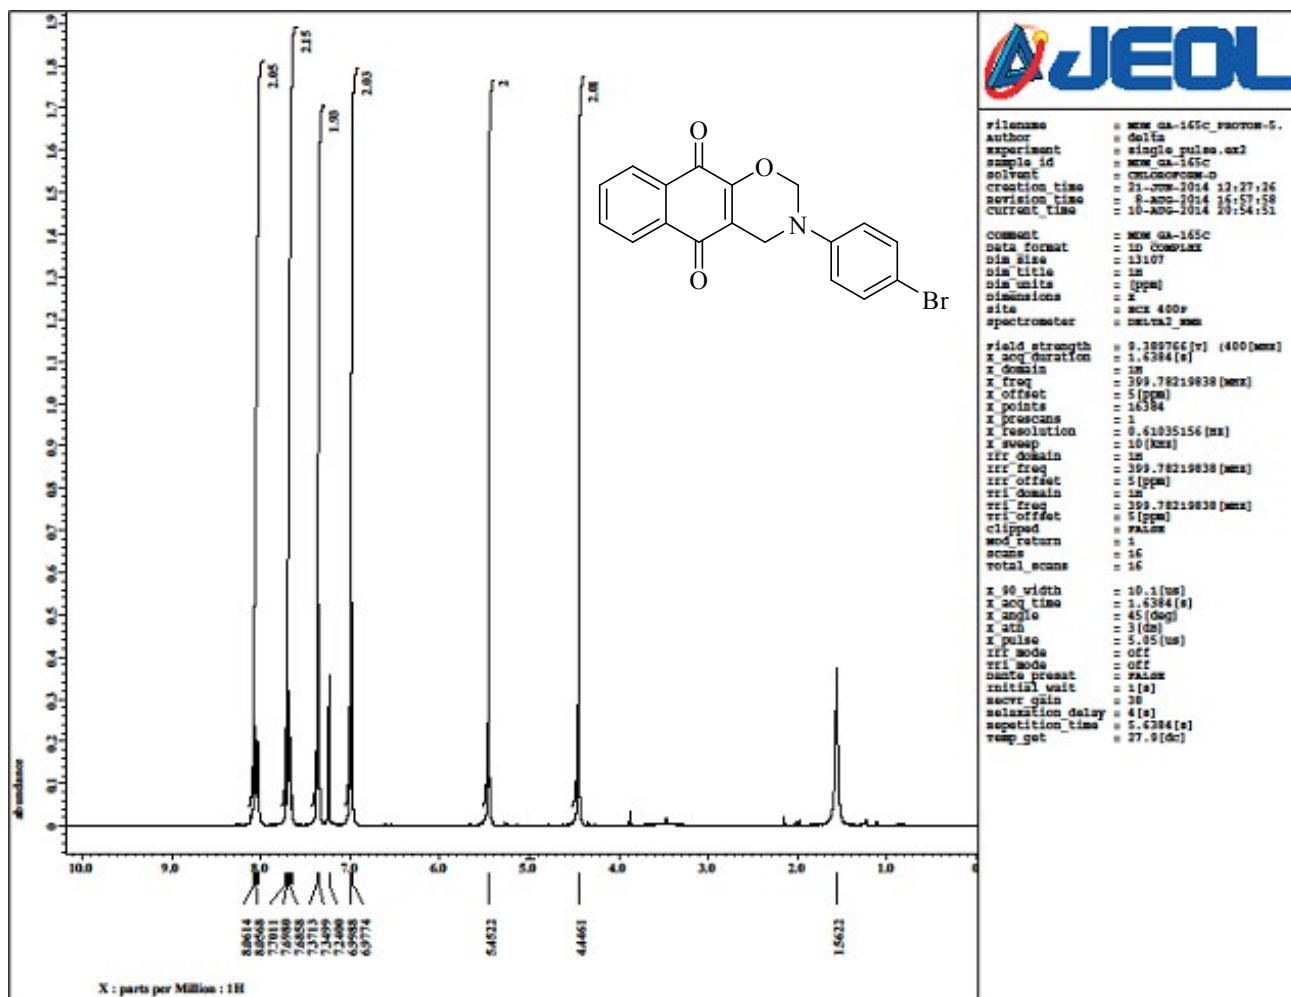

<sup>13</sup>C NMR of 2e

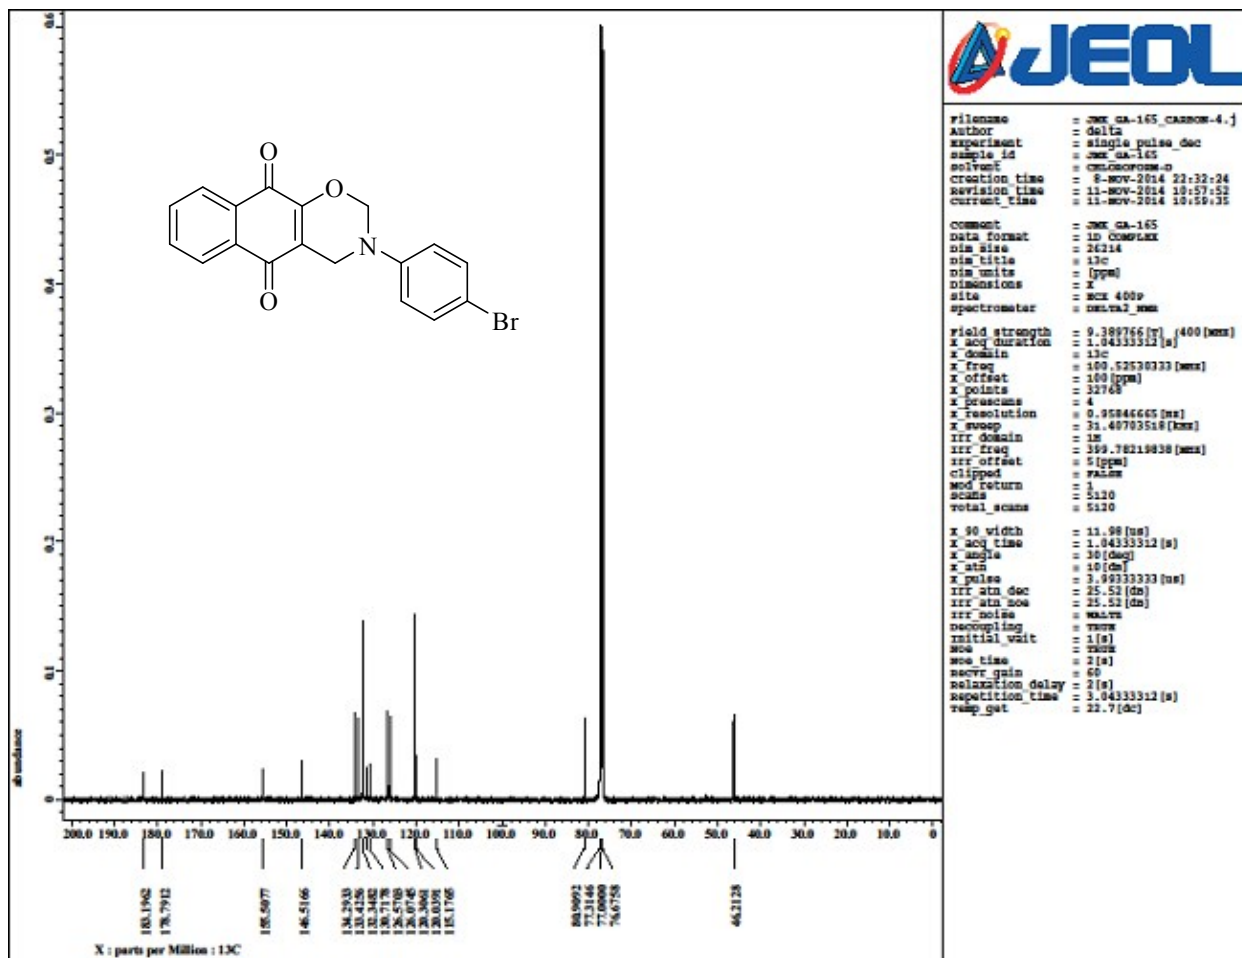

# <sup>1</sup>H NMR of 2f

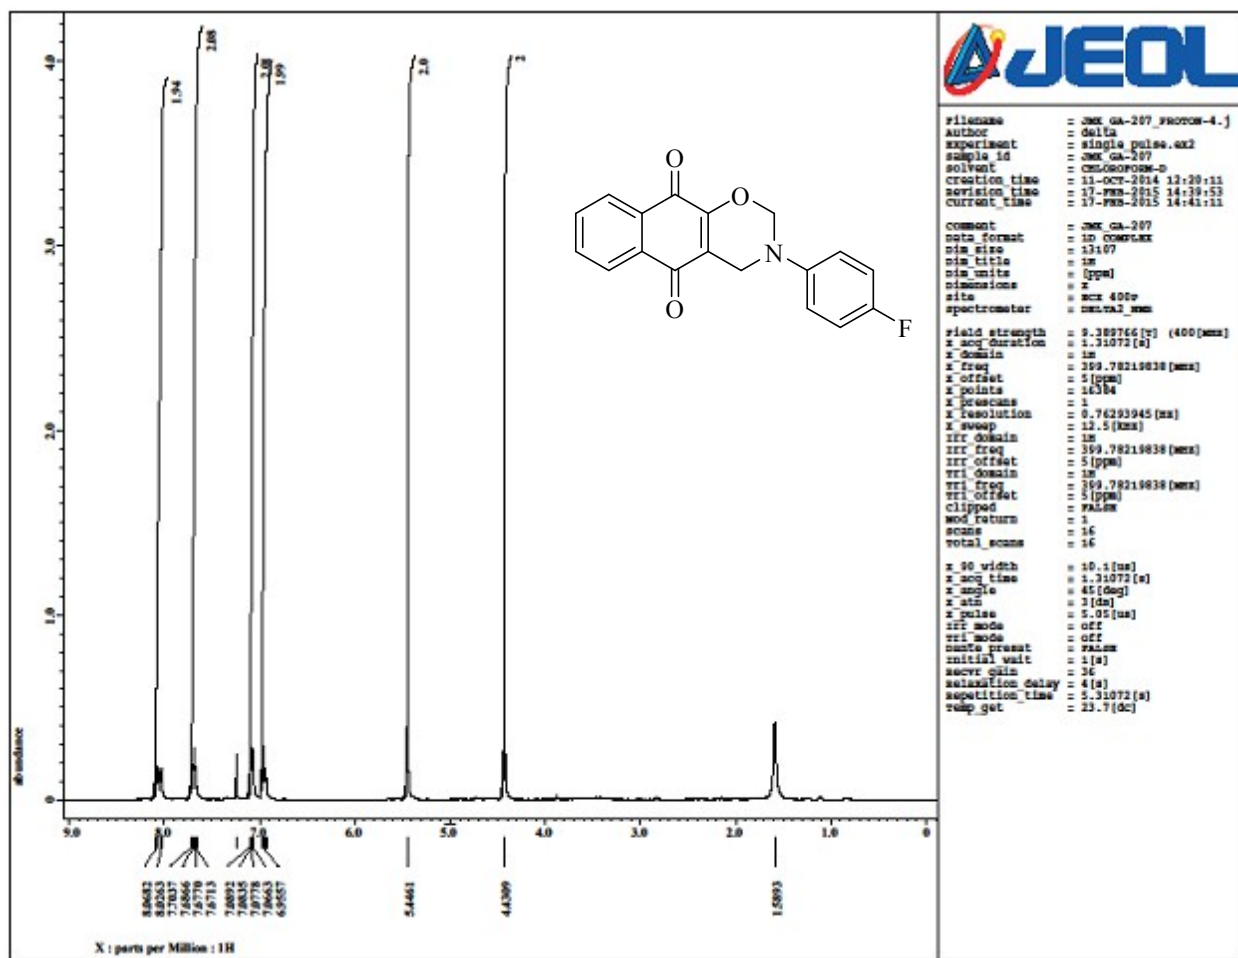

<sup>13</sup>C NMR of 2f

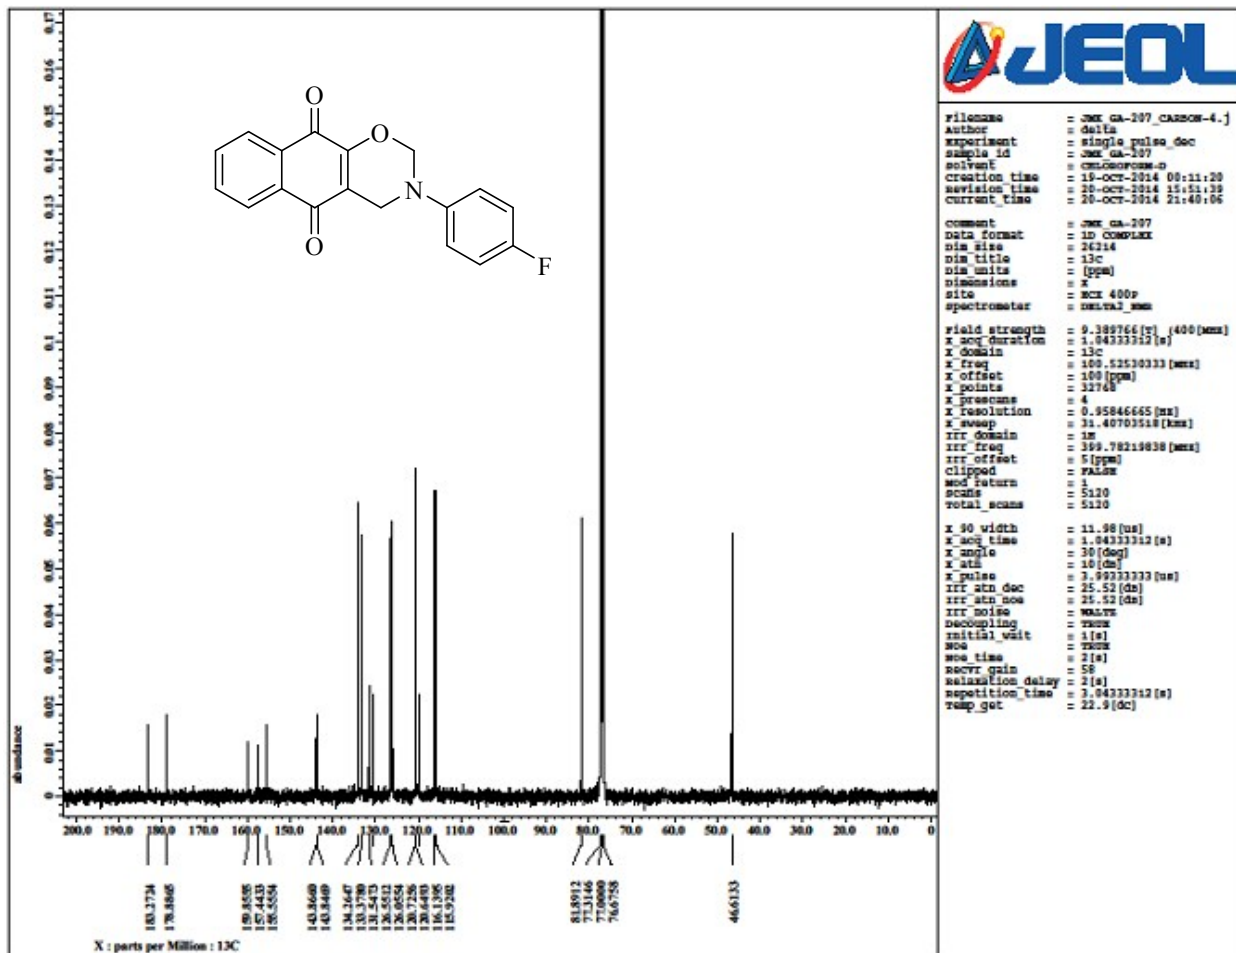

# $^{19}\text{F}$ NMR of 2f

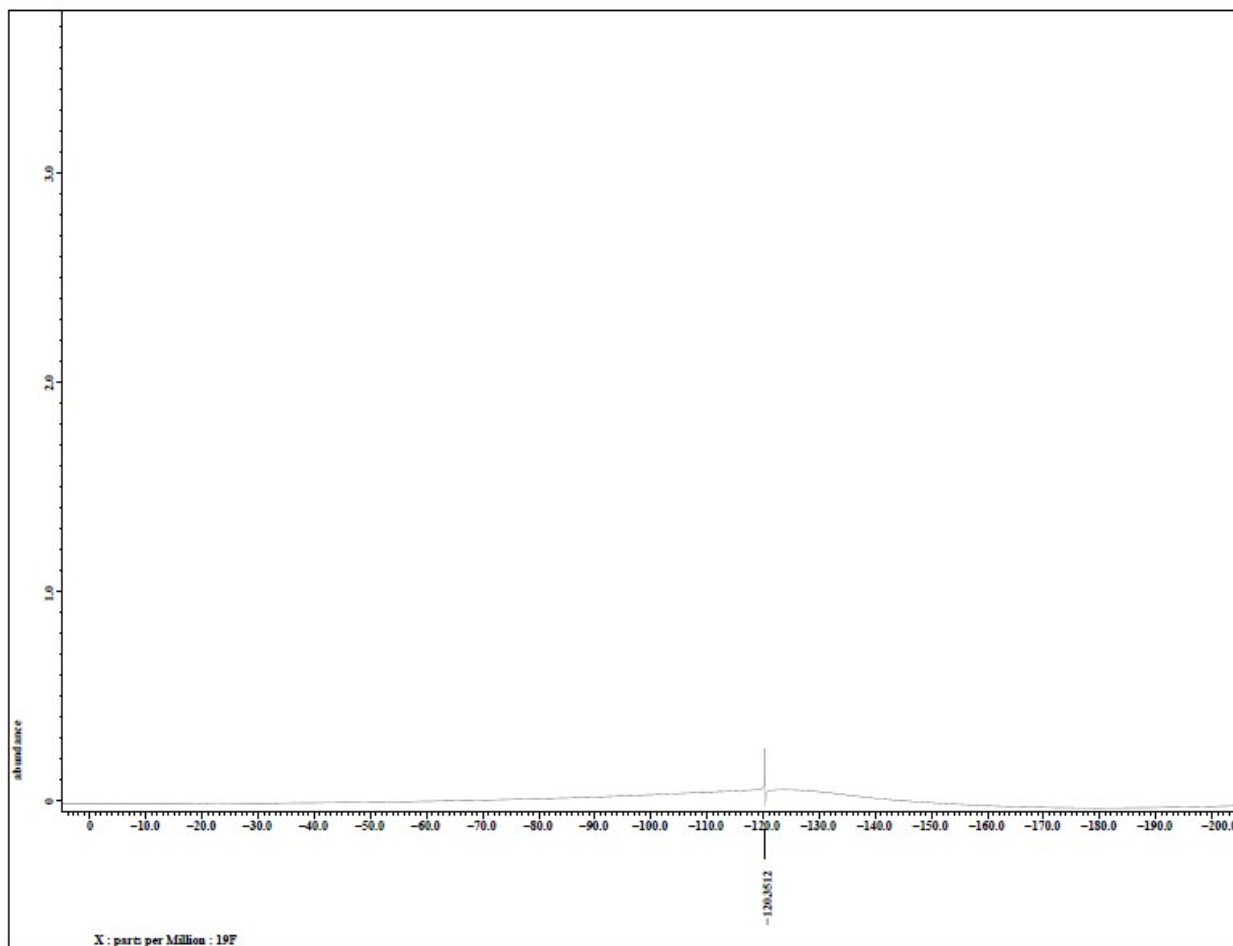

# <sup>1</sup>H NMR of 2g

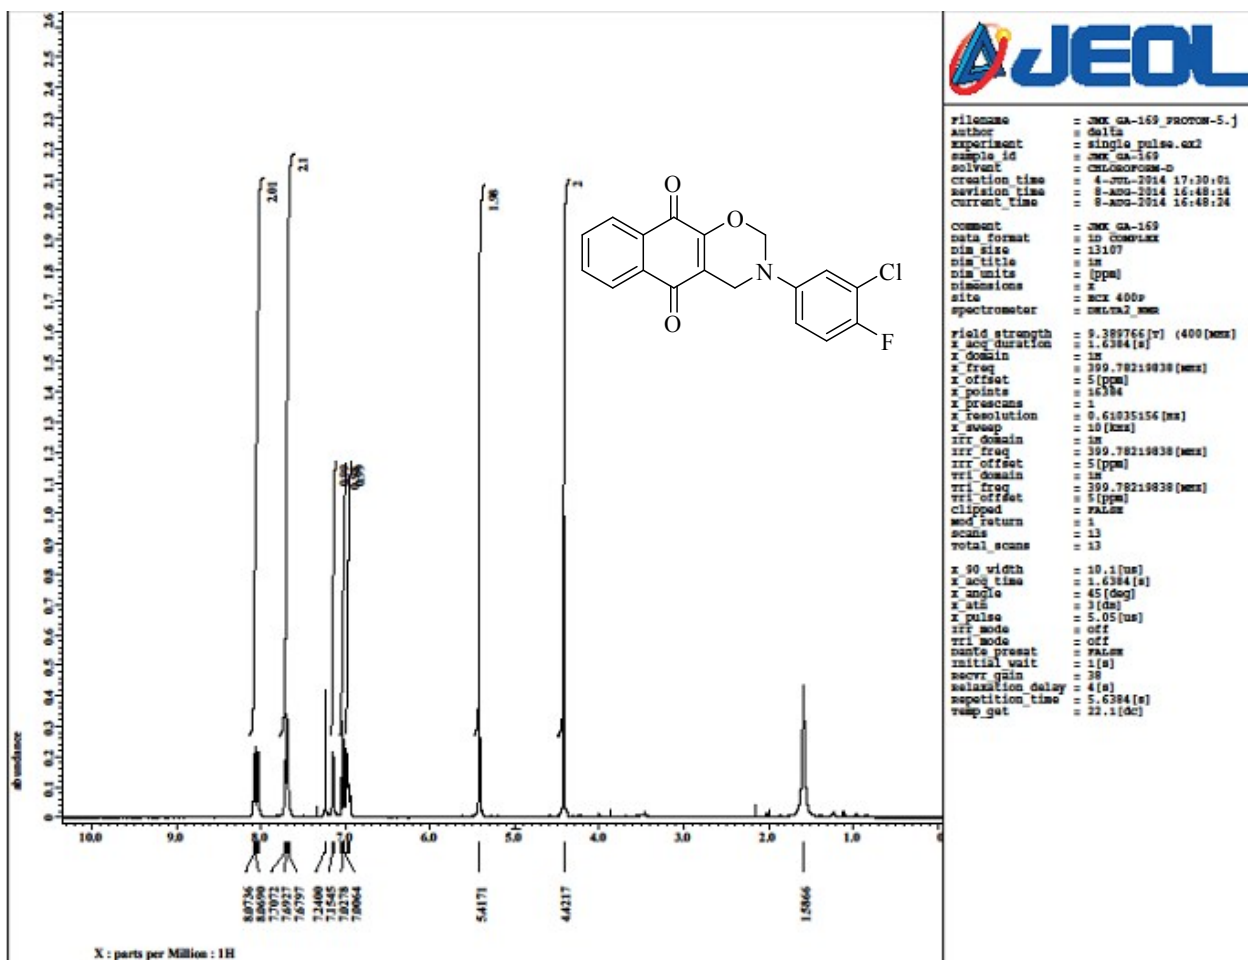

<sup>13</sup>C NMR of 2g

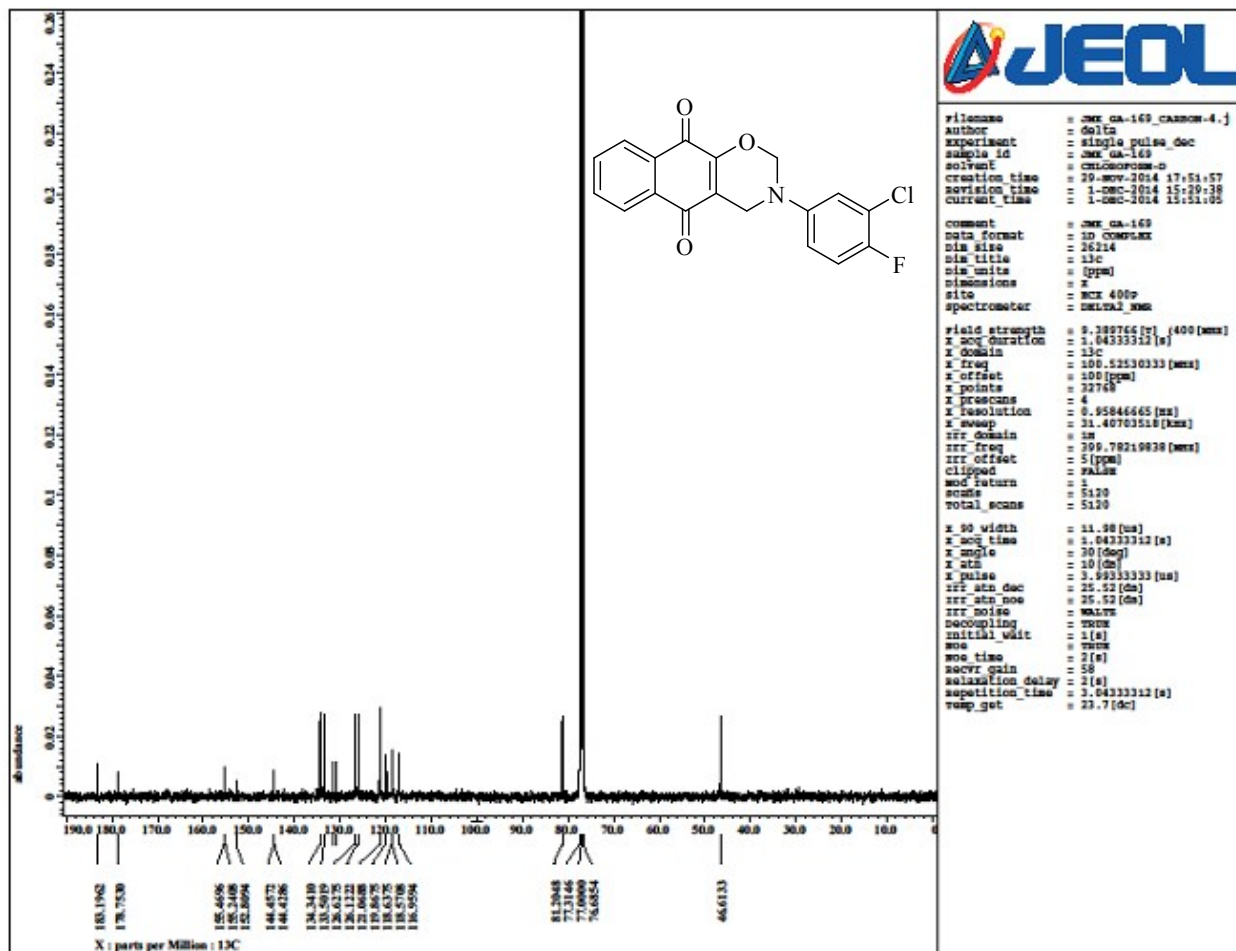



<sup>1</sup>H NMR of 2h

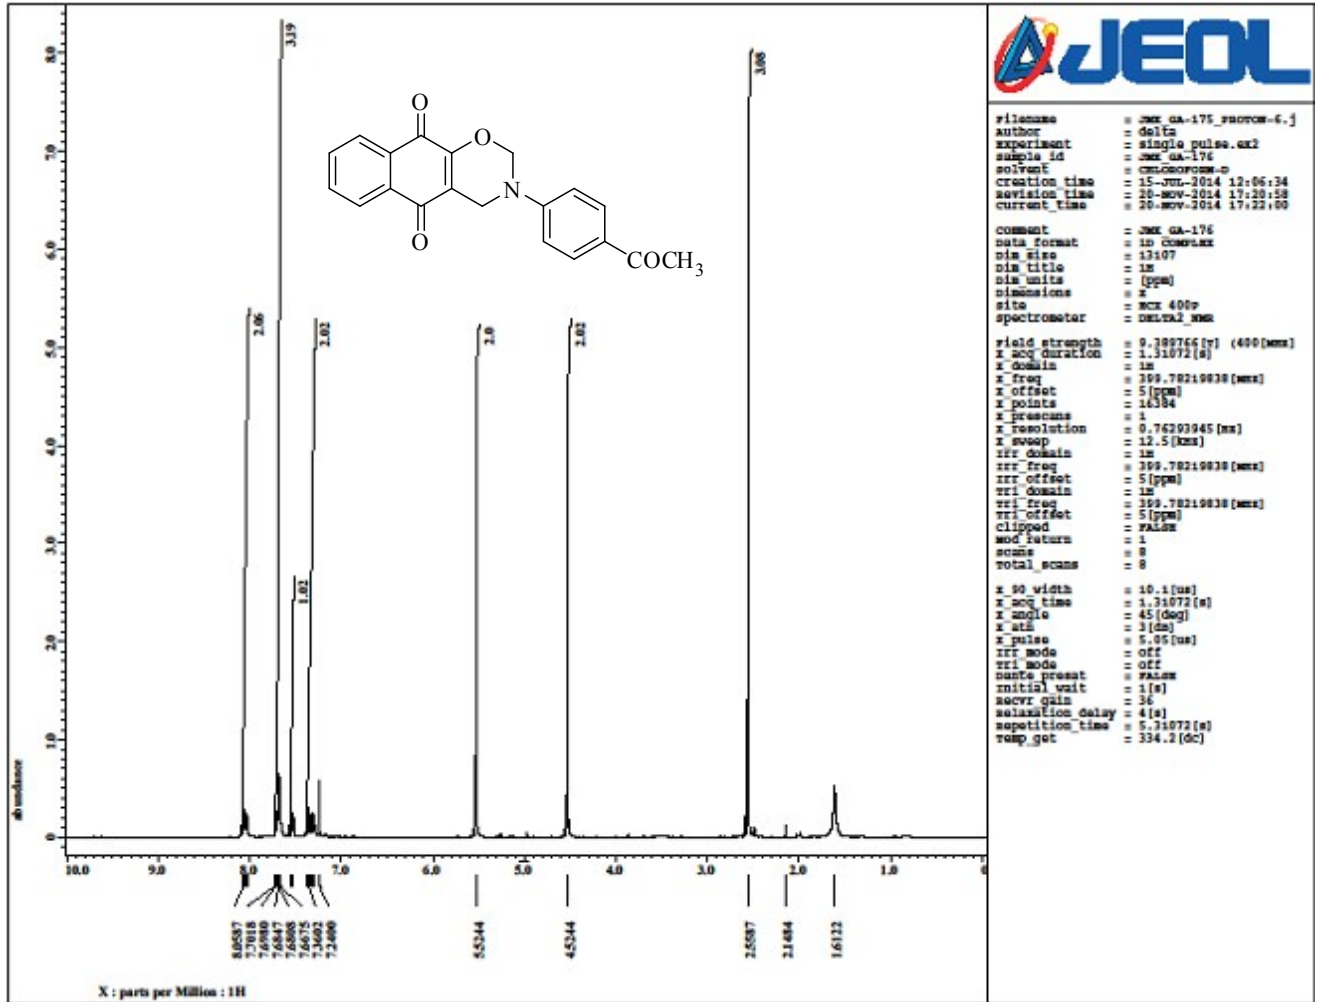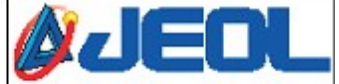

```

filename      = jnx ga-175_purom-6.j
author       = delta
experiment   = single_pulse.ex2
sample_id    = jnx ga-176
solvent      = CDCl3
creation_time = 15-Jun-2014 12:06:34
revision_time = 20-Nov-2014 17:20:58
current_time = 20-Nov-2014 17:22:00

comment      = jnx ga-176
data_format  = in csmvax
data_size    = 13107
bin_title    = 18
bin_units    = (ppm)
dimensions   = 2
site        = WCX 400P
spectrometer = dmtral_wm

field_strength = 0.389766 [T] (400[Mhz])
F1_acq_duration = 1.31072 [s]
F1_domain       = 18
F1_freq         = 399.78219938 [Mhz]
F1_offset       = 5 [ppm]
F1_points       = 16384
F1_prescans     = 1
F1_resolution   = 0.74203945 [Hz]
F1_sweep        = 12.5 [KHz]
F1F_domain      = 18
F1F_freq        = 399.78219938 [Mhz]
F1F_offset      = 5 [ppm]
F1F_domain      = 18
F1F_freq        = 399.78219938 [Mhz]
F1F_offset      = 5 [ppm]
clipped         = FALSE
mod_fatern      = 1
scans           = 8
total_scans     = 8

X_f0_width     = 10.1 [us]
X_acq_time     = 1.31072 [s]
X_angle        = 45 [deg]
X_atn          = 3 [db]
X_pulse        = 5.95 [us]
IRI_mode       = off
vri_mode       = off
pulse_program  = FALSM
initial_wait   = 1 [s]
recvr_gain     = 34
relaxation_delay = 4 [s]
repetition_time = 5.31072 [s]
temp_get       = 334.2 [C]
    
```

# <sup>13</sup>C NMR of 2h

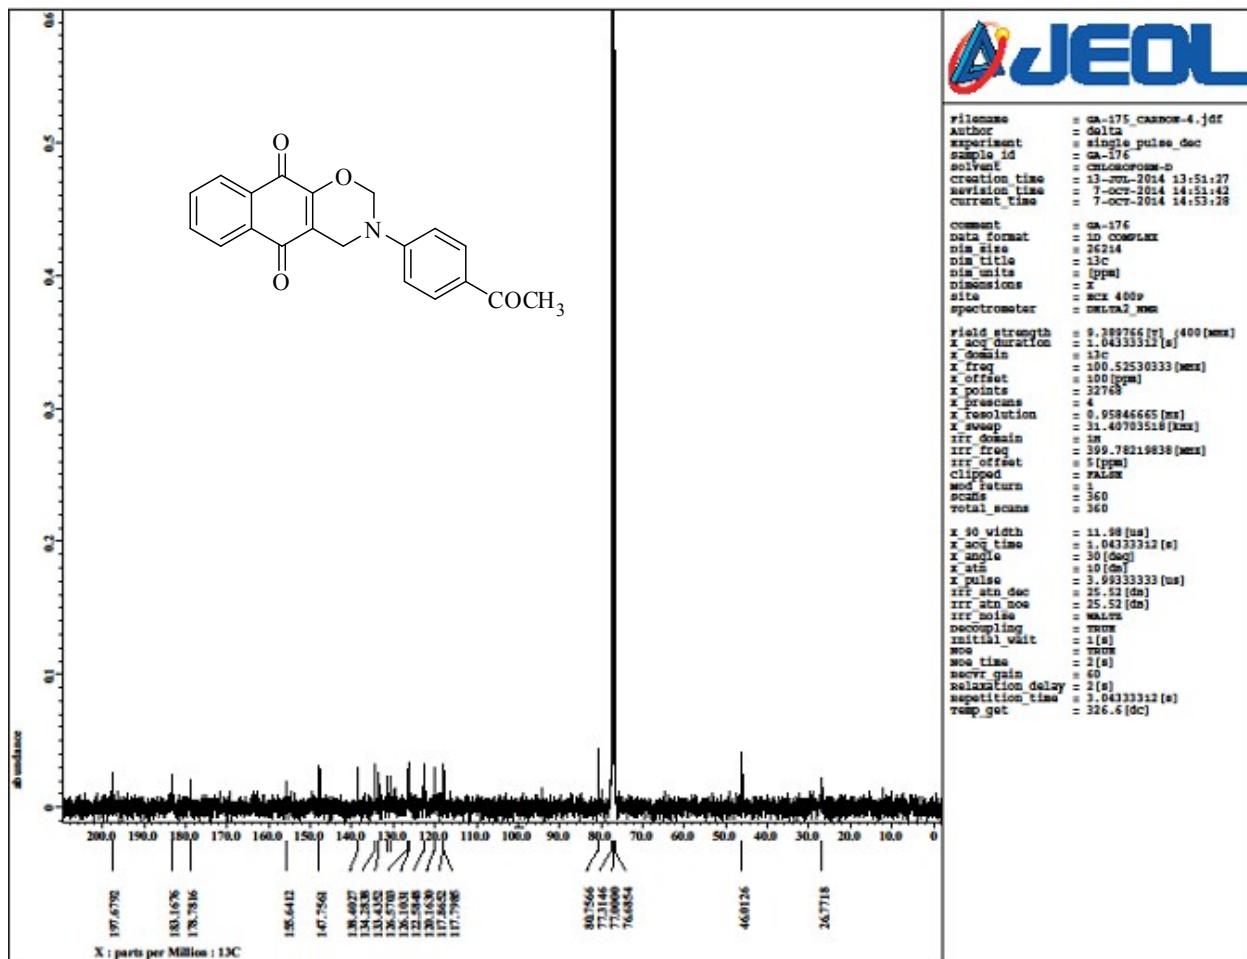

<sup>1</sup>H NMR of 2i

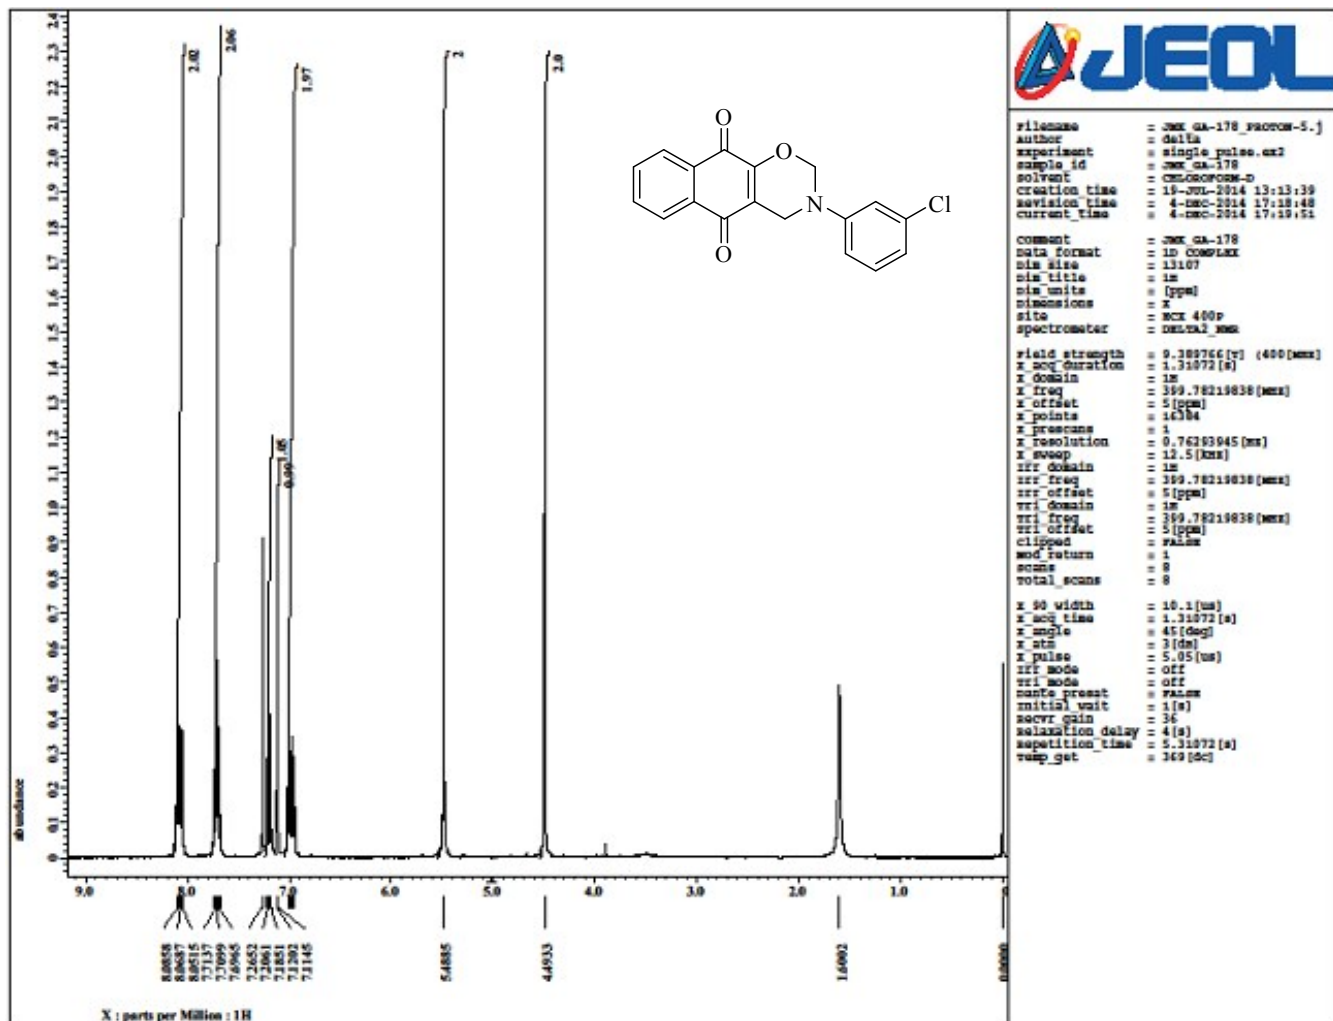

<sup>13</sup>C NMR of 2i

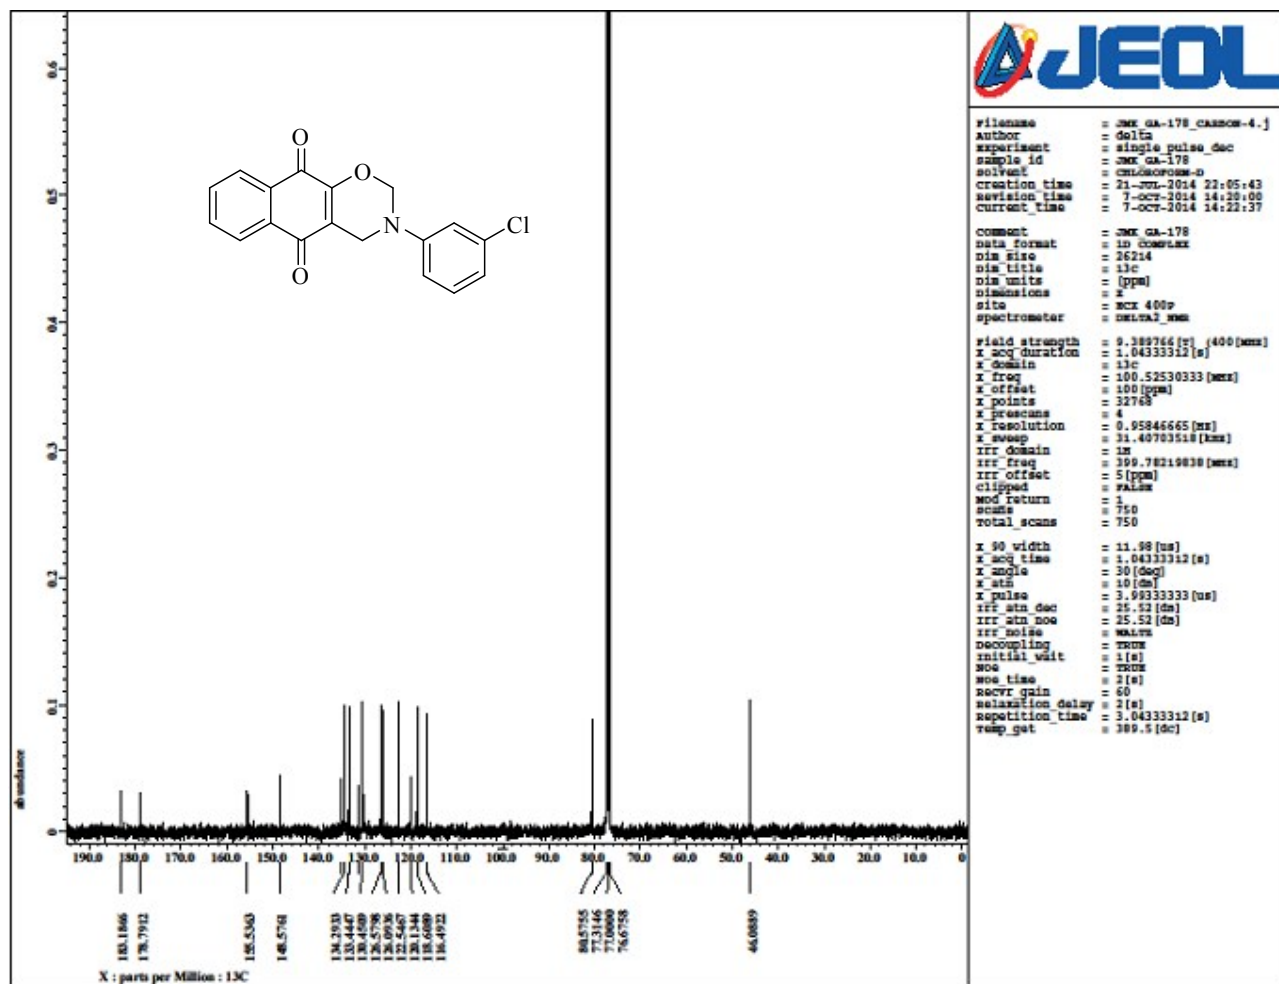

<sup>1</sup>H NMR of 2j

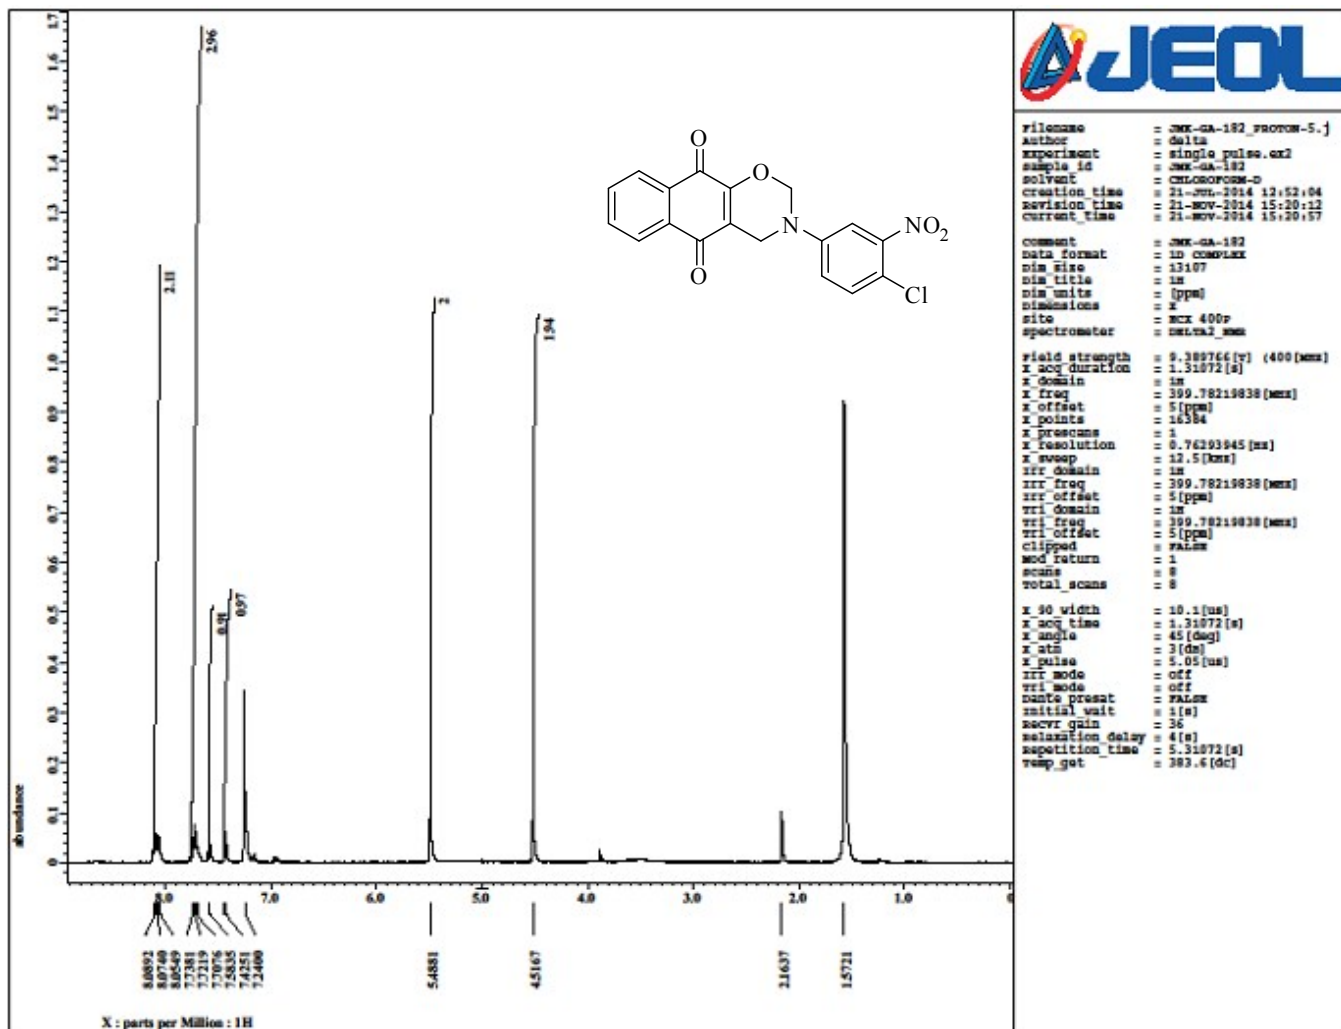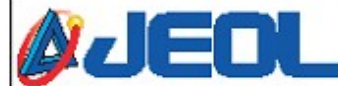

```

filename = cmk-ga-182_fa000w-5.j
Author = delta
experiment = single_pulse.cmk
sample id = cmk-ga-182
solvent = CHLOROFORM-D
creation time = 21-NOV-2014 12:52:04
revision time = 21-NOV-2014 15:20:12
current time = 21-NOV-2014 15:20:57

comment = cmk-ga-182
data format = 1D_COMPLEX
file size = 13107
file title = 1H
file units = (ppm)
instruments = X
pulse program = MEX 400p
spectrometer = DELTA2 400

field strength = 9.399766 (v) (400 (mhz))
f2 acq duration = 1.31072 (s)
in = 1H
X freq = 399.78219838 (mhz)
X offset = 5 (ppm)
X points = 16384
X prescans = 1
X resolution = 0.76293845 (hz)
X sweep = 12.5 (kms)
irr domain = 1H
irr freq = 399.78219838 (mhz)
irr offset = 5 (ppm)
wri domain = 1H
wri freq = 399.78219838 (mhz)
wri offset = 5 (ppm)
clipped = FALSE
mod return = 1
scans = 8
total scans = 8

x 90 width = 10.1 (us)
x acq time = 1.31072 (s)
x angle = 45 (deg)
x atm = 3 (dm)
x pulse = 5.05 (us)
irr mode = off
wri mode = off
dante preset = FALSE
initial wait = 1 (s)
recvr gain = 36
relaxation delay = 4 (s)
repetition time = 5.31072 (s)
temp set = 283.6 (K)
    
```

<sup>1</sup>H NMR of 2k

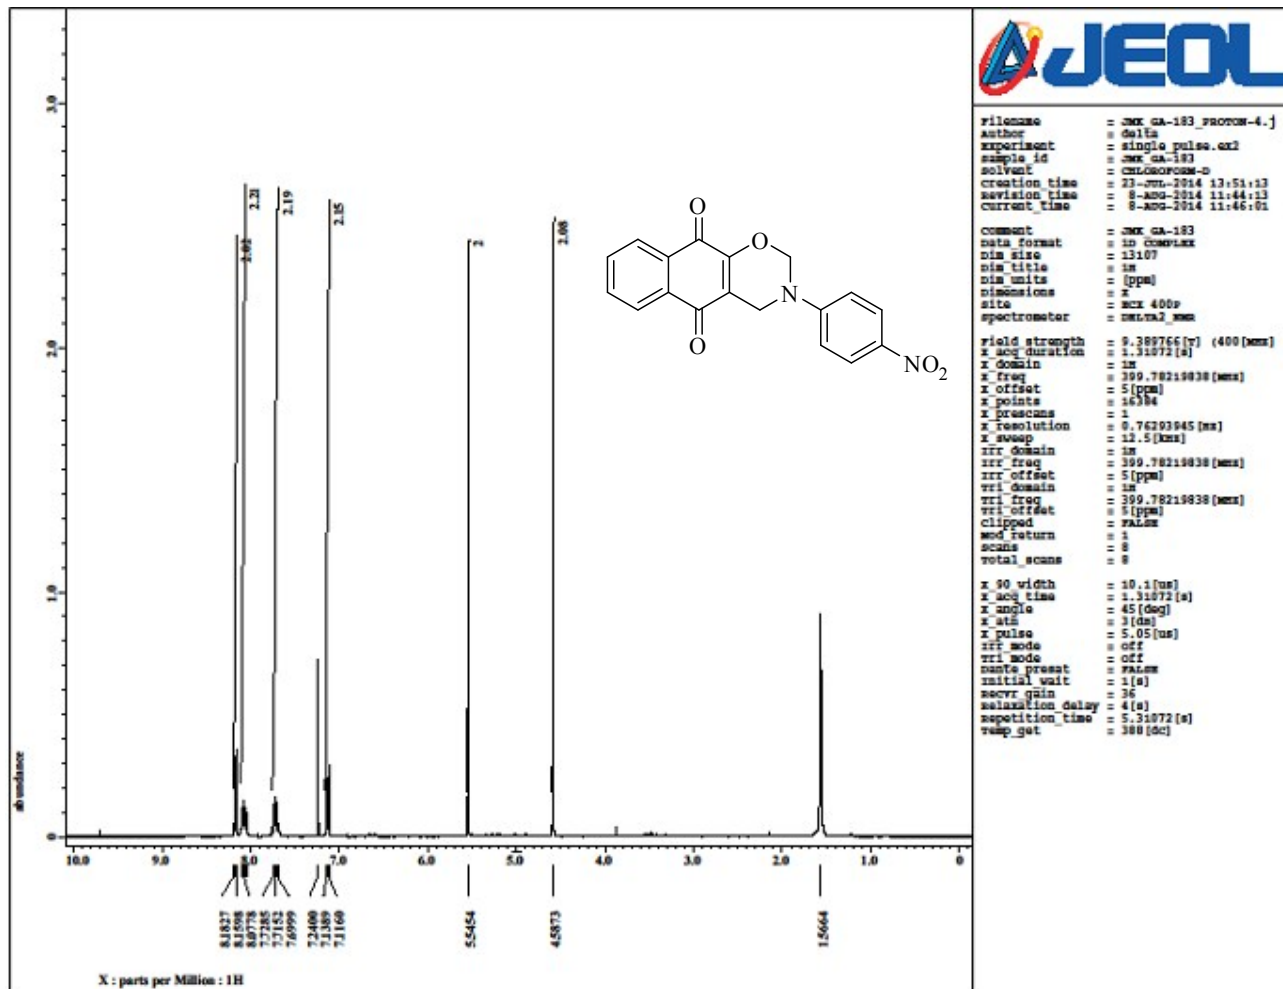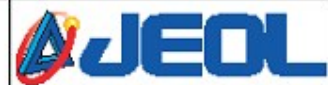

```

file_name = JMK GA-183 proton-4.j
author = Gdlts
experiment = single_pulse.ex2
sample_id = JMK GA-183
solvent = CHLOROFORM-D
creation_time = 23-Jun-2014 13:51:13
revision_time = 8-Aug-2014 11:44:13
current_time = 8-Aug-2014 11:46:01

comment = JMK GA-183
data_format = 2D COMPLEX
dim_size = 13107
dim_title = 1M
dim_units = (ppm)
dimensions = 2
site = BXX 400p
spectrometer = DELTA2 400

field_strength = 9.389756(T) (400 MHz)
f1_acq_duration = 1.31072(s)
f1_domain = 1M
f1_freq = 399.78219838 (MHz)
f1_offset = 5 (ppm)
f1_points = 16334
f1_prescans = 1
f1_resolution = 0.76203945 (Hz)
f1_sweep = 12.5 (kHz)
f1r_domain = 1M
f1r_freq = 399.78219838 (MHz)
f1r_offset = 5 (ppm)
f1r_domain = 1M
f1r_freq = 399.78219838 (MHz)
f1r_offset = 5 (ppm)
clipped = FALSE
mod_return = 1
scans = 8
total_scans = 8

x_90_width = 10.1 (us)
x_acq_time = 1.31072 (s)
x_angle = 45 (deg)
x_atd = 3 (ds)
x_pulse = 5.05 (us)
irf_mode = off
vri_mode = off
date_preset = FALSE
initial_wait = 1 (s)
swept_gain = 36
relaxation_delay = 4 (s)
repetition_time = 5.31072 (s)
ramp_gut = 380 (sc)
    
```

<sup>1</sup>H NMR of 2l

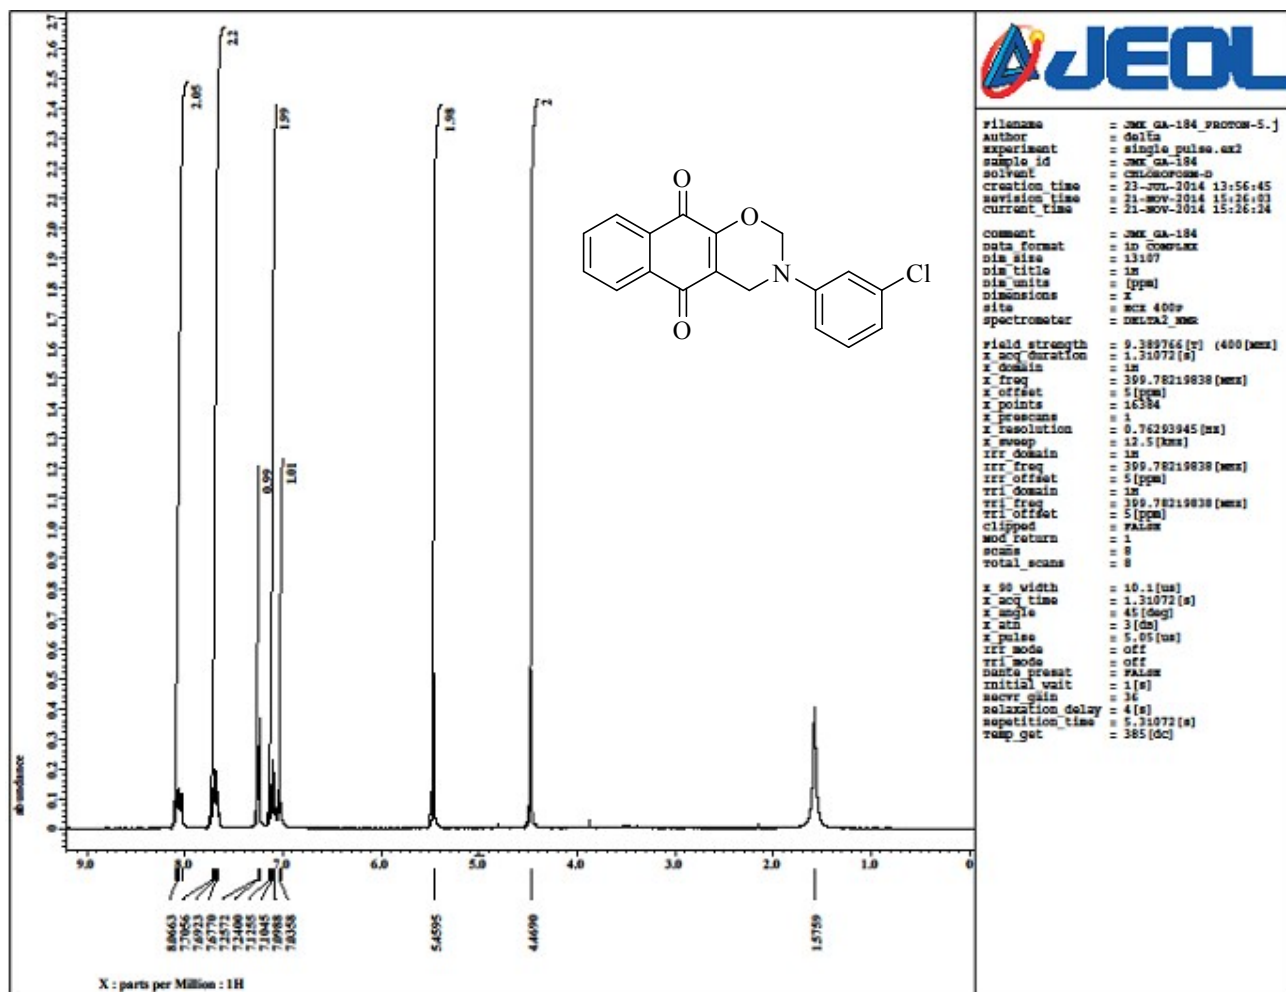

<sup>13</sup>C NMR of 2l

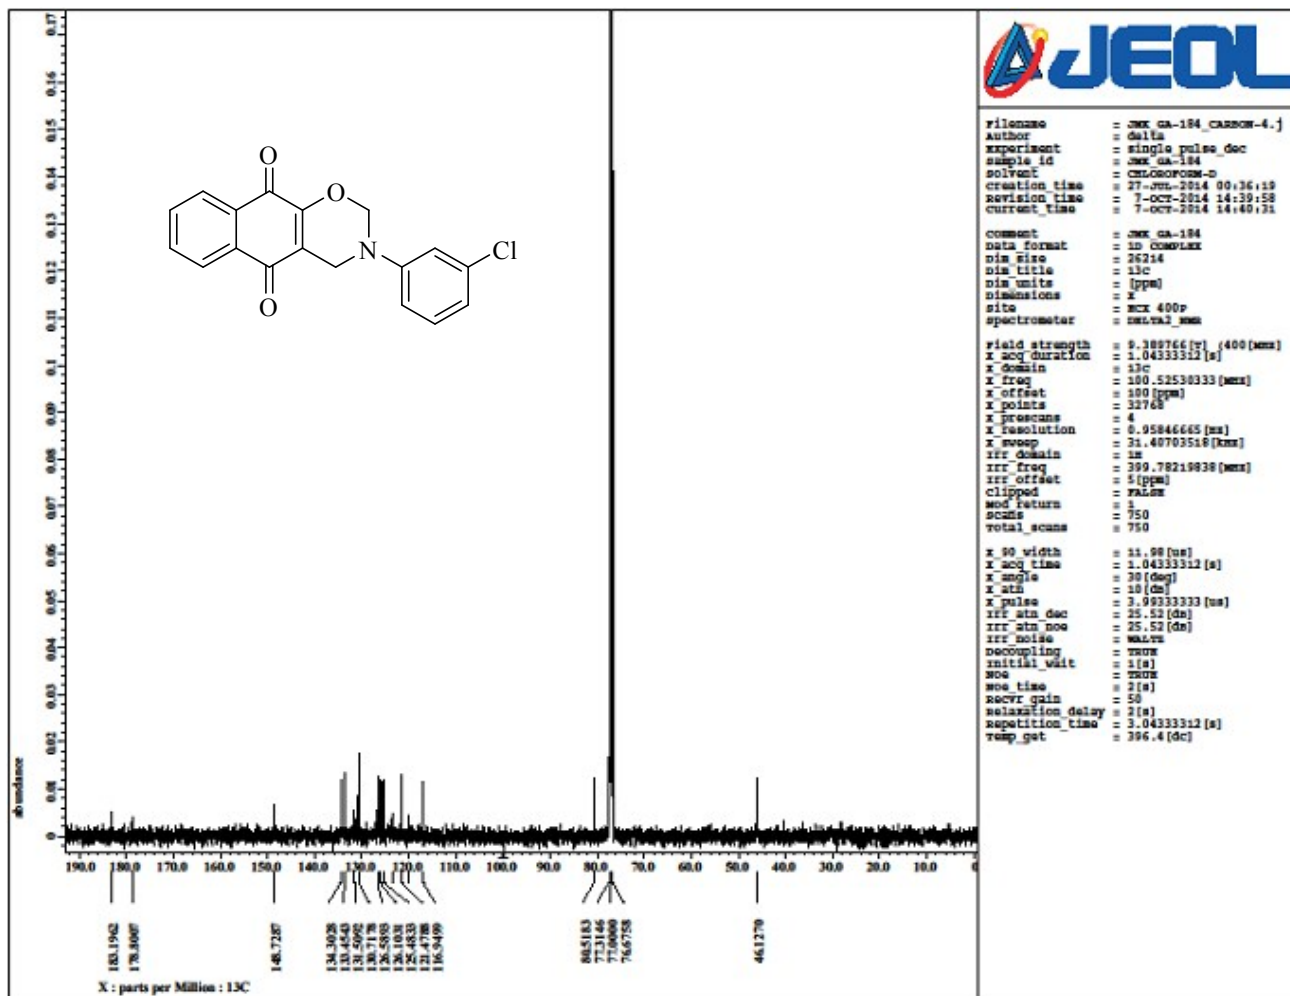



<sup>1</sup>H NMR of 2m

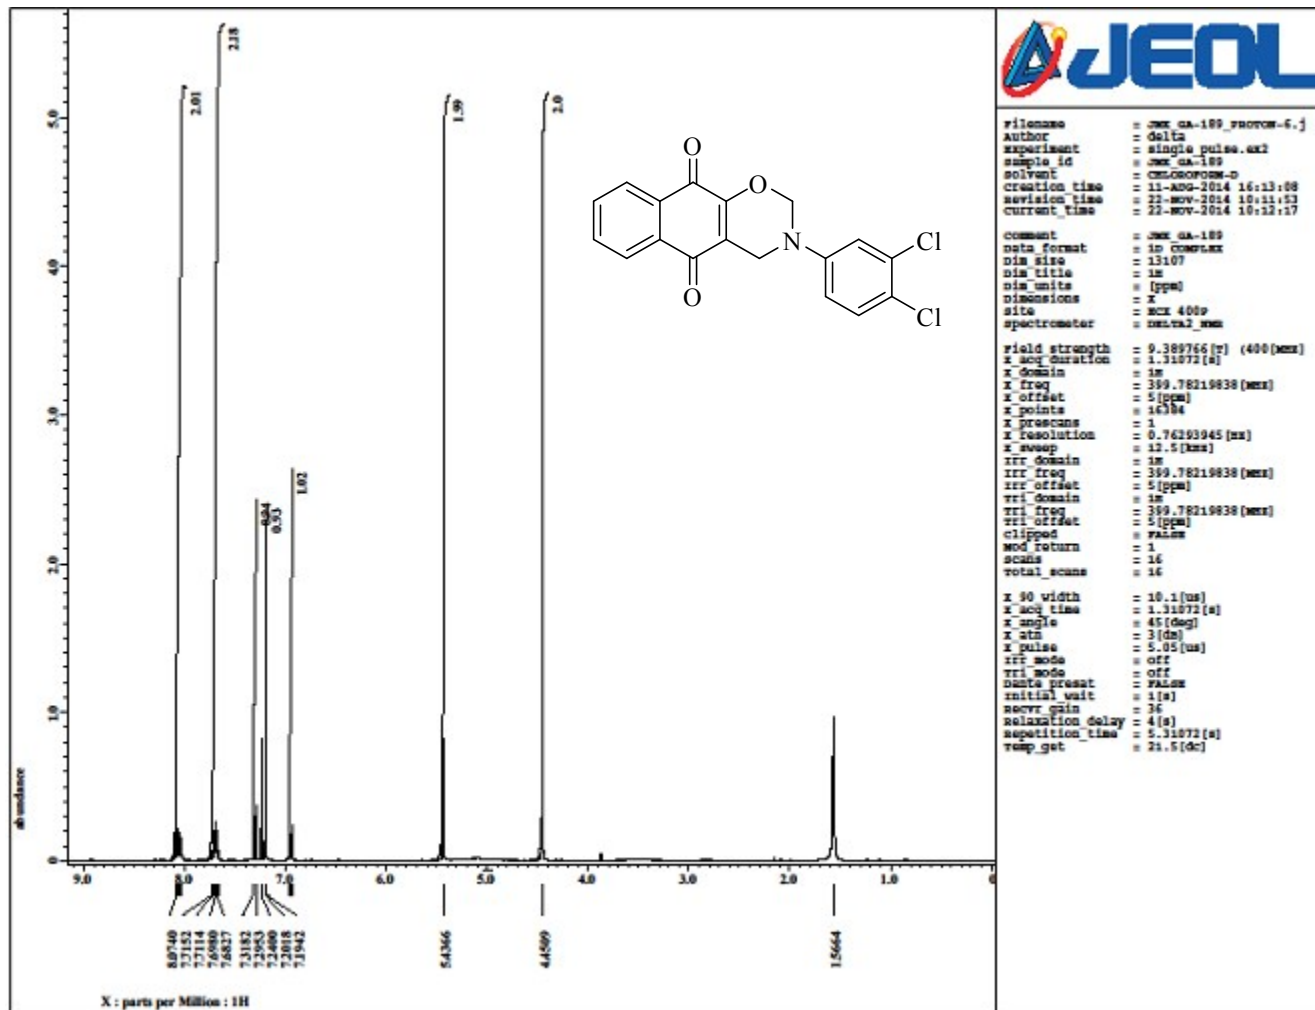

<sup>13</sup>C NMR of 2m

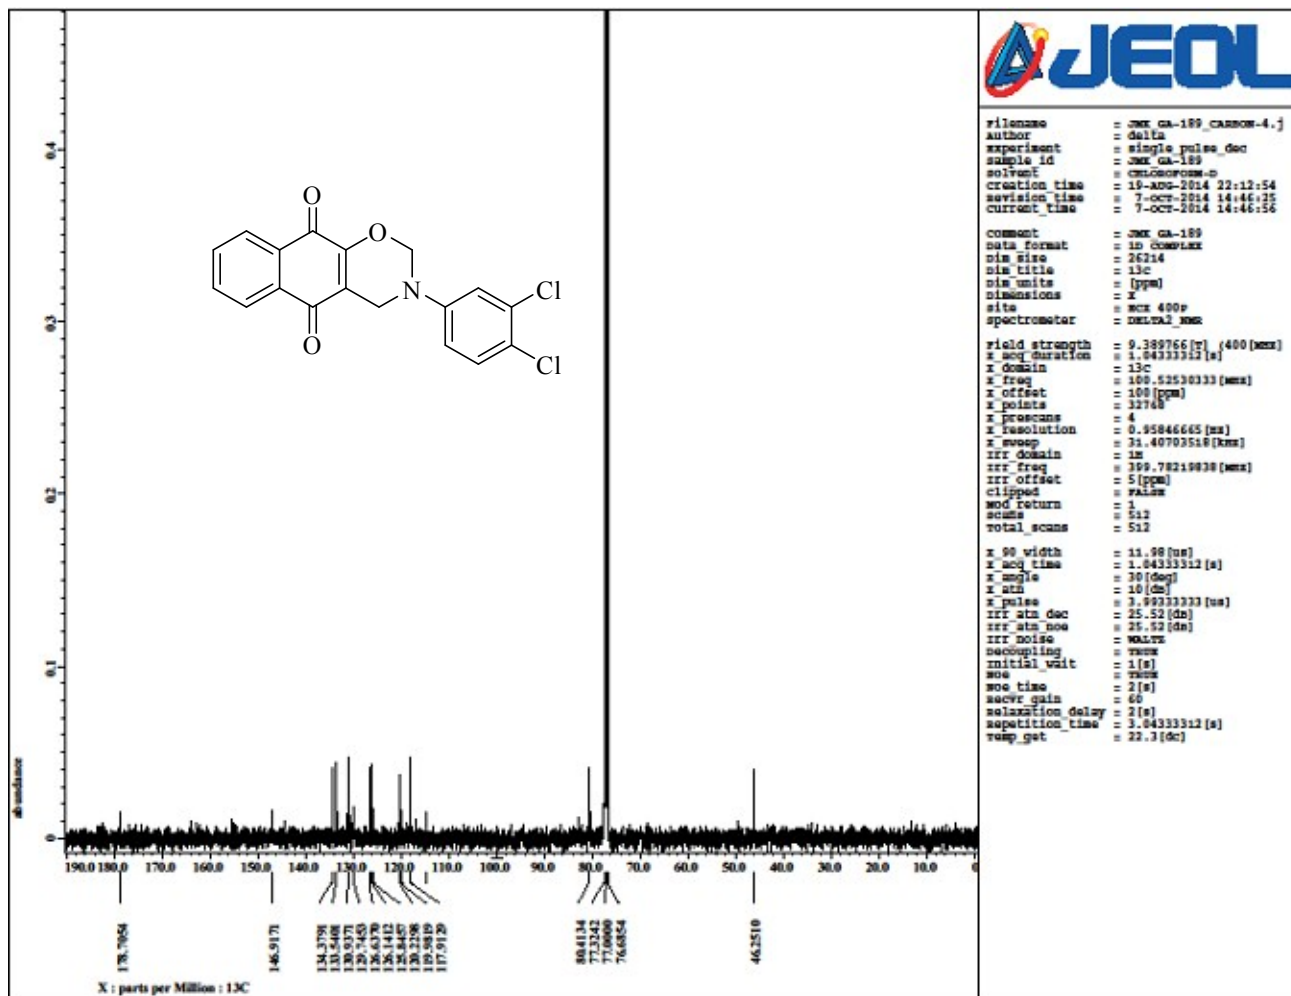

# <sup>1</sup>H NMR of 2n

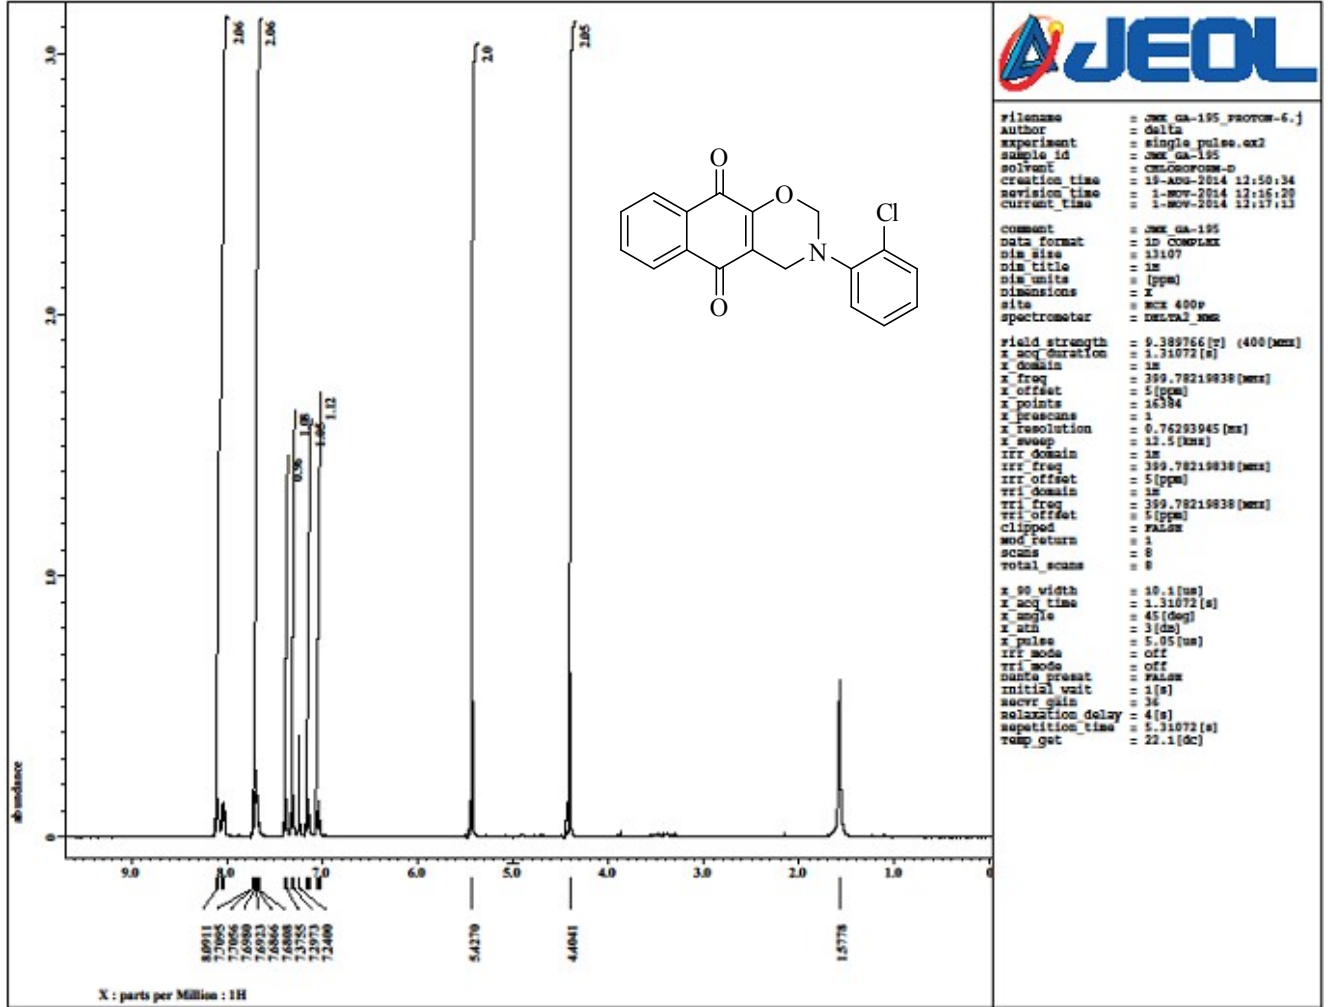

<sup>13</sup>C NMR of 2n

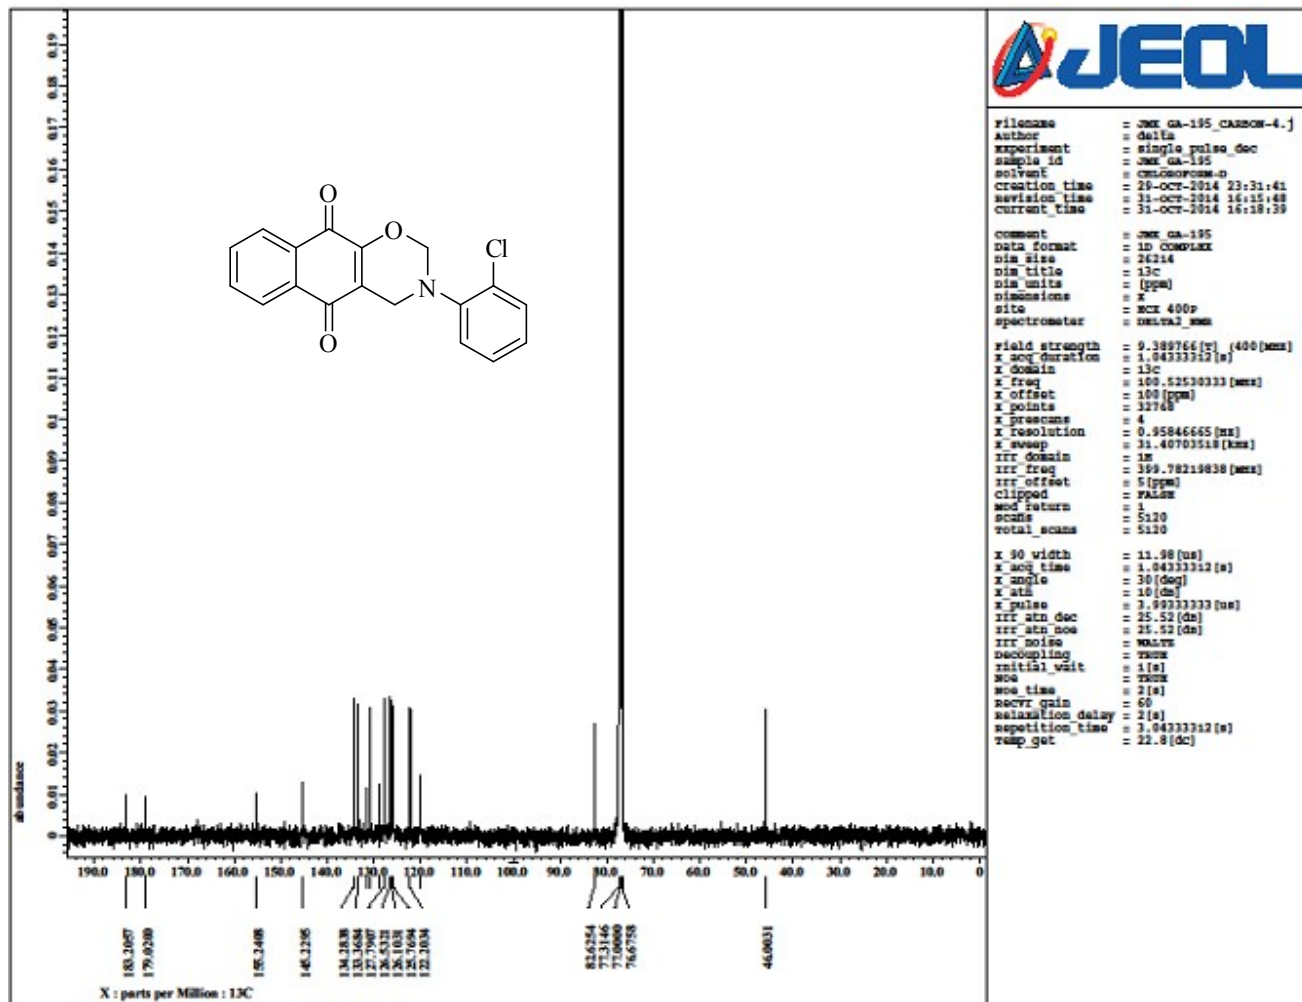

<sup>1</sup>H NMR of 2o

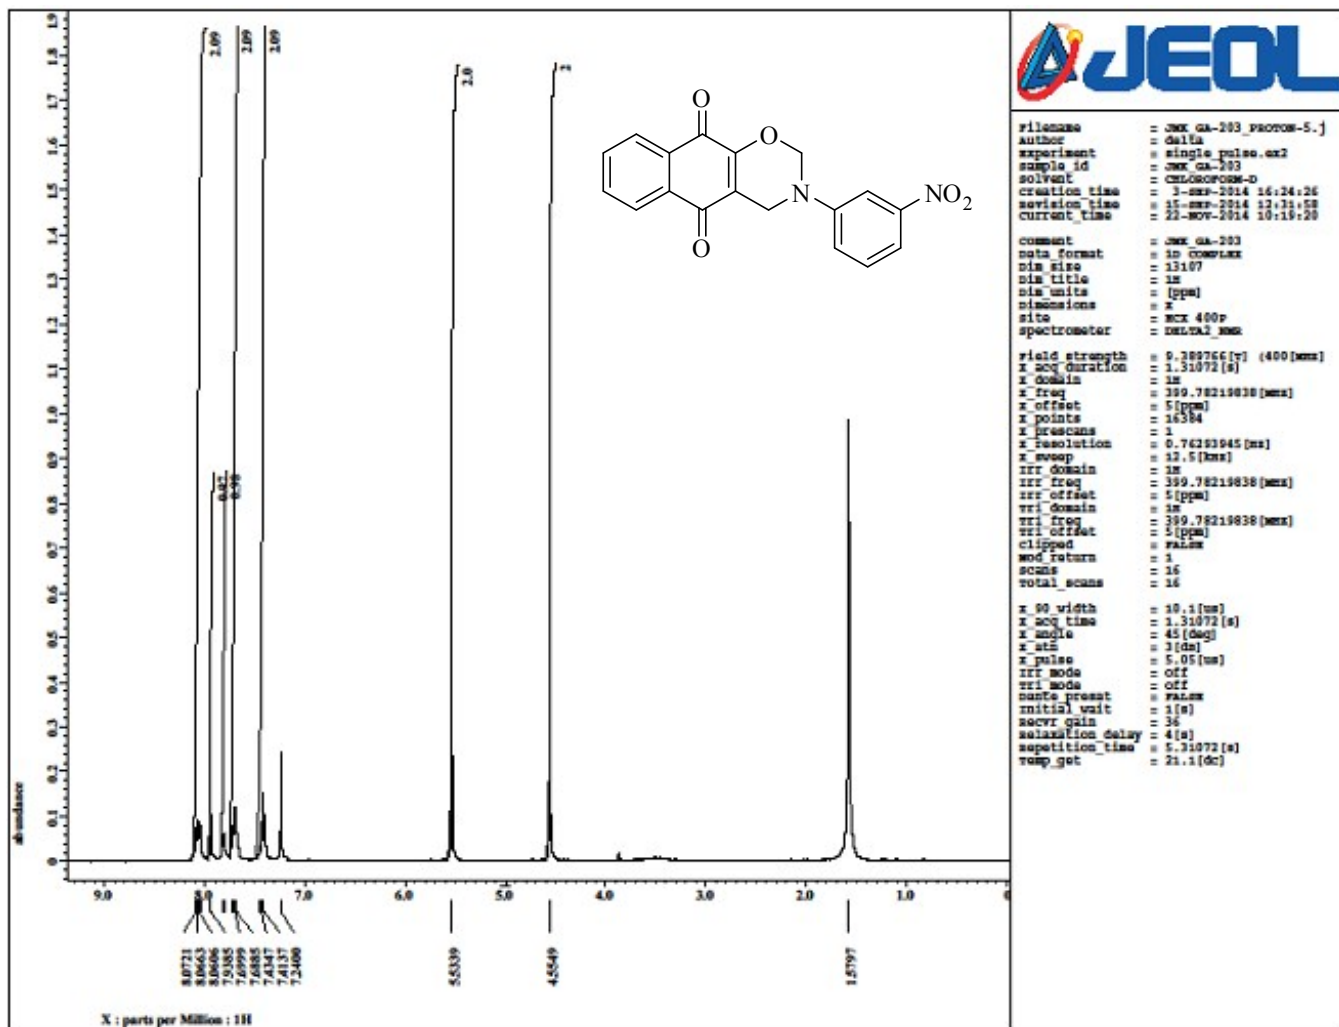

Supplement: c5ra06169e1.pdf [file c5ra06169e1.pdf]
